# Supplementary material
Source: PubMed Central journal article supplement (PMC5808928)
Supplement: NIHMS936900-supplement-SI.pdf [file NIHMS936900-supplement-SI.pdf]

## Supporting Information

### **Quantum Refinement Does Not Support Dinuclear Copper Sites in Crystal Structures of Particulate Methane Monooxygenase**

*Lili Cao, Octav Caldararu, Amy C. Rosenzweig, and Ulf Ryde\**

anie\_201708977\_sm\_miscellaneous\_information.pdf

## Methods

### Quantum refinement

Quantum refinement is standard crystallographic refinement supplemented by QM calculations for a small, but interesting part of the protein.<sup>[1,2]</sup> Crystallographic refinement software change the protein model (coordinates, occupancies, B factors, etc.) to improve the fit of the observed and calculated structure-factor amplitudes (usually estimated as the residual disagreement, the  $R$  factor). Owing to the limited resolution normally obtained for biomolecules, the experimental data are supplemented by some chemical information, usually in the form of a MM force field.<sup>[3]</sup> Then, the refinement takes the form of a minimization or simulated annealing calculation by molecular dynamics using an energy function of the form

$$E_{\text{cryst}} = w_A E_{\text{Xray}} + E_{\text{MM}} \quad (1)$$

where  $E_{\text{Xray}}$  is a penalty function that describes how well the model agrees with the experimental data (we have used a maximum-likelihood refinement target using amplitudes, MLF<sup>[4,5]</sup>).  $E_{\text{MM}}$  is an empirical (molecular mechanics, MM) energy function with bond, angle, dihedral and non-bonded terms, and  $w_A$  is a weight factor, which is necessary because  $E_{\text{MM}}$  is in energy units whereas  $E_{\text{Xray}}$  is unit-less. It determines the relative importance of the crystallographic raw data and the MM force field for the final structure.

Quantum chemistry can be introduced in this function by replacing the MM potential for a small region of the protein (system 1) by QM calculations, yielding a QM energy for system 1,  $E_{\text{QM1}}$ . To avoid double counting, we must then subtract the MM energy of system 1,  $E_{\text{MM1}}$ ,

$$E_{\text{cqx}} = w_A E_{\text{Xray}} + E_{\text{MM12}} + w_{\text{QM}} E_{\text{QM1}} - E_{\text{MM1}} \quad (2)$$

Thereby, we introduce an accurate energy function for the system of interest. Such an energy function is implemented in the software ComQum-X,<sup>[1]</sup> which is a combination of the QM software Turbomole<sup>[6]</sup> and the crystallography and NMR system (CNS),<sup>[7,8]</sup> version 1.3. The factor  $w_{\text{QM}}$  in Eq. 5 is another weight, which is needed because the CNS MM force field is based on a statistical analysis of crystal structures.<sup>[9]</sup> Therefore, the force constants are not energy-derived, as is the QM term, but they are in arbitrary statistical units. Experience has shown that the CNS force constants are typically three times larger than energy-based force constants,<sup>[9]</sup> and  $w_{\text{QM}} = 3$  has therefore been used throughout this work.<sup>[1]</sup> Crystallographic refinement is traditionally performed without any electrostatic interactions, because hydrogen atoms are not discerned in the structure. We have followed this custom and excluded electrostatics and hydrogen atoms from all crystallography and MM calculations (but they are of course included in the QM calculations).

Two crystal structures were studied in this investigation, viz. the revised pMMO structure from *M. capsulatus* (Bath) (3RGB) at 2.8 Å resolution<sup>[10]</sup> and the 2.68-Å structure of pMMO from *Methylocystis* sp. strain M (3RFR).<sup>[10]</sup> Coordinates, occupancies, B factors and structure factors were obtained from the protein databank files. From these files, we also obtained the space group, unit-cell parameters, resolution limits,  $R$  factors and the test set used for the evaluation of the  $R_{\text{free}}$  factor.

The full protein was used in all calculations, including all crystal water molecules. In each cycle of the geometry optimization, the surrounding protein was allowed to relax by one cycle of crystallographic minimization and one cycle of individual B-factor refinement. However, the new coordinates and B factors were accepted only if the  $R$  factor was reduced. The  $w_A$  factor was determined by CNS in the first iteration of the refinement and then kept fixed. It was 4.91 for 3RGB and 4.93 for 3RFR. Electron-density maps were generated using

*phenix.maps*.<sup>[11]</sup>

We used the standard CNS MM force field for all atoms (protein\_rep.param, water\_rep.param, and ion.param). For the junctions, where a bond is broken between the QM and MM regions, we employed the hydrogen link-atom approach i.e. the QM systems were truncated by H atoms (called HL below), replacing a C atom in the protein (called CL). The force field for the QM system was constructed automatically from that of the protein. For the HL atoms, we employed the same angle and dihedral parameters as for the CL atoms. For the XL–HL bond (where XL is the atom in the QM system bound to HL), we used as the equilibrium bond length ( $r_{\text{XL-HL}}^0$ ) that obtained by geometry optimisation with the TPSS-D3/def2-SV(P) approach for a model of the isolated ligand (e.g. imidazole). The force constant ( $k_{\text{XL-HL}}$ ) was obtained from the corresponding force constant and equilibrium bond length of the XL–CL bond according to:

$$k_{\text{XL-HL}} = k_{\text{XL-CL}} \left( \frac{r_{\text{XL-HL}}^0}{r_{\text{XL-CL}}^0} \right)^2 \quad (3)$$

Van der Waals parameters of 0.0188 kJ/mol and 2.2272 Å were used for all junction atoms (taken from the HA atom type).

The quality of the models was compared using the real-space difference density Z-score<sup>[12]</sup> (RSZD), calculated by EDSTATS in the CCP4 suite,<sup>[13]</sup> which measures the local accuracy of the model. The maximum of the absolute values of the positive and negative RSZD (combined RSZD) for the Cu ion and all the first-sphere ligands was taken as the quality metric (individual values for each of the groups are given in the supplementary material). It is called RSZD in the main text and RSZD<sub>max</sub> in this supplementary material (to differ it from RSZD for the individual residues and atoms, which also will be discussed). RSZD is typically < 3.0 for a good model. In addition, the strain energy of the active site ( $\Delta E_{\text{str}}$ ) was calculated, i.e. the difference in the QM energy of the QM region when optimised in the crystal or freely in vacuum.<sup>[14]</sup>

### QM calculations

All QM calculations were performed with the Turbomole software, version 7.1.<sup>[6]</sup> We employed the density-functional theory (DFT) method TPSS<sup>[15]</sup> and the def2-SV(P)<sup>[16]</sup> basis set. The calculations were sped up by expanding the Coulomb interactions in an auxiliary basis set, the resolution-of-identity (RI) approximation.<sup>[17,18]</sup> Empirical dispersion corrections were included with the DFT-D3 approach<sup>[19]</sup> and Becke–Johnson damping,<sup>[20]</sup> as implemented in Turbomole.

The QM system consisted of one or two Cu ions, two imidazole groups modelling the sidechains of His-137 and 139, and H<sub>2</sub>N–(CH<sub>2</sub>)<sub>2</sub>–imidazole, as a model of His-33 (sidechain and backbone). Sometimes, one or two water molecules were added or models of Glu-35, Asp-79C (modelled by an acetate groups), Tyr-374 (modelled by phenol) or His-137 was extended to imidazole–(CH<sub>2</sub>)<sub>2</sub>–CO–NH–CH<sub>3</sub>, including the backbone towards the next residue. The Cu ions were always modelled in both the Cu<sup>+</sup> and Cu<sup>2+</sup> states, in the latter case with unrestricted formalism. For dimeric Cu sites, we employed three oxidation states: fully reduced, fully oxidised and the mixed-valence Cu<sup>+</sup>–Cu<sup>2+</sup> state. After some test calculations, we decided to use the ferromagnetically coupled triplet state for the fully oxidised state, which was lower in energy than the antiferromagnetically coupled open-shell singlet state (obtained with the broken-symmetry approach), owing to the lack of any strong bridging ligand.

For the study of the reaction mechanism (Figure 6 in the main article), structures with the same QM model (plus a methane molecule) were optimised in gas phase with the TPSS-D3/def2-SV(P) approach. Then, more accurate single-point energies were calculated with the def2-TZVPD<sup>[21,22]</sup> basis set and both the TPSS-D3 and B3LYP-D3<sup>[23–25]</sup> methods. These calculations were run in a COSMO continuum solvent.<sup>[26,27]</sup> The default optimised COSMO radii (and a water solvent radius of 1.3 Å),<sup>[28]</sup> whereas a radius of 2 Å was used for the metals.<sup>[29]</sup> The dielectric constant was 4, whereas we used default values for all other parameters. Frequency calculations were performed at the TPSS-D3/def2-SV(P) level of theory and from these, zero-point energies were calculated and it was confirmed that transition states had one and minima had no imaginary frequencies.

### Details of quantum refined structures of protomer 1 of the 3RGB structure

We started by performing quantum refinement of site A in the first protomer of the 3RGB structure using a dinuclear Cu site (called C2W0 in the tables to indicate that it contains two Cu ions and no extra water molecules). This gave structures quite similar to the starting crystal geometry as can be seen in Figures S1a and S1b: The two Cu ions are on top of each other, but in variance to the starting structure (Figure 1a in the main article), all three imidazole groups are directed towards the Cu ions with the ND1 (His-33 and His-137; called N<sub>A</sub> and N<sub>B</sub> in the following and in the Tables) or NE2 (His-139; N<sub>C</sub>) atoms binding. One of the Cu ions (Cu<sub>A</sub>) coordinates to all four N atoms, whereas the other (Cu<sub>B</sub>) coordinates to only one or two of them (N<sub>A</sub> and possibly also N<sub>C</sub>). The distance to the His-33 backbone amide group (N<sub>D</sub>) is typically longer than that to the imidazole groups. The detailed distances depend on the oxidation states of the two Cu ions and are listed in Table S1. In the (fully) reduced state, the two Cu<sub>B</sub>–N distances (to N<sub>A</sub> and N<sub>C</sub>) are short (2.02–2.03 Å), whereas the four Cu<sub>A</sub>–N distances are longer and much more varying (2.07–2.63 Å). This reflects the preference of Cu<sup>+</sup> for low coordination numbers. However, in the mixed-valence (MV) and (fully) oxidised states, the Cu<sub>A</sub>–N distances to the imidazole groups are short, 2.05–2.15 Å, that to N<sub>D</sub> is somewhat longer, 2.24–2.30 Å, whereas only the Cu<sub>B</sub>–N<sub>A</sub> distance is short (2.08–2.13 Å) and the Cu<sub>B</sub>–N<sub>C</sub> bond is essentially broken, 2.89–2.93 Å. The Cu–Cu distance is 2.21–2.25 Å. The spin densities show that Cu<sub>B</sub> is actually in the reduced state also in the fully oxidised structure. Instead, the spin is spread over Cu<sub>A</sub> (0.34 *e*) and the ligands. Also in the MV state, there is no spin on Cu<sub>B</sub> and only 0.41 *e* spin on Cu<sub>A</sub>.

If we set  $w_A = 0$  in Eqn. 2, i.e. turn off the restraint towards the experimental data, thereby obtaining a QM/MM calculation with the CNS MM force field, the MV and especially the oxidised structures reorganise significantly, as can be seen in Table S1 (method Q). However, the reduced structure remains more intact, with both Cu ions two-coordinate with Cu–N distances of 1.89–2.08 Å and a Cu–Cu distance of 2.46 Å. This reflects the intrinsic preferences of the metals and the ligands in the protein.

Further information about the preferences of the metal can be obtained by freely optimising the metals and the four ligands in vacuum, i.e. ignoring the covalent and steric influence of the protein (besides the covalent link between N<sub>A</sub> and N<sub>D</sub>). For the reduced site, this gave little changes from the QM/MM structure (cf. Table S1, method V). For the MV and oxidised states, the differences were larger, but mainly related to Cu<sub>B</sub>, which bound with side-on interactions with the imidazole rings, because all N atoms were occupied in a square-planar coordination to Cu<sub>A</sub>.

To obtain structures that better fitted the experimental data, we attempted to model the site in other ways. First, we tried to use the model suggested by Yoshizawa and coworkers in their QM/MM studies of the reaction mechanism,<sup>[30–32]</sup> i.e. a dimeric model with the two Cu ions and the four N ligands in the same plane (Figure S2a). We could successfully obtain such a structure by model building and then refining the structure with  $w_A = 0$ . The structures are

described in Table S1 (called Y2W0a). Cu<sub>A</sub> binds to His-33 (both sidechain and backbone amide) and His-137 with Cu<sub>A</sub>–N = 1.97–2.09 Å. The latter group bridges to Cu<sub>B</sub>, which also binds to His-139 with distances of 1.86–1.99 Å. The Cu–Cu distance is 2.35–2.45 Å, actually increasing with the oxidation state of the Cu ions. However, if we turned on the restraint towards the experimental data, the site went back to something similar to the original QM-refined structures, i.e. with the four N atoms mainly coordinating to Cu<sub>A</sub>.

A prime problem with site A, especially in the higher oxidation states, is that it contains too few ligands for two metal ions. Therefore, we tried to enhance the site with two water molecules. After many attempts, we were able to obtain some reasonable structures and the best (in terms of RSZD<sub>max</sub>) are shown in Tables S1 and S2 (called Y2W2), and in Figure 2b. In the MV and oxidised structures, Cu<sub>A</sub> is still coordinated by all four N atoms in a square plane (Cu–N distances of 1.98–2.13 Å) and also by one of the water molecules in an axial position (2.52–2.53 Å). N<sub>B</sub> and N<sub>C</sub> bridges to Cu<sub>B</sub> but with a quite poor geometry (2.07–2.19 Å). Cu<sub>B</sub> also binds to the other water molecule (2.02–2.04 Å). The RSZD<sub>max</sub> scores are higher for the reduced structure, but appreciably better for the MV and oxidised states (1.5) than the structures started from the original crystal structure. The strain energies are also appreciably better, 149–159 kJ/mol. However, the  $2F_o - F_c$  electron-density maps in Figure 3a in the main article show that there is no electron density around the water molecules.

Consequently, we also optimised the corresponding structures without the water molecules (Y2W0 in Tables S1 and S2). They are more similar for all three oxidation states (except that N<sub>C</sub> does not bind to Cu<sub>A</sub> in the reduced state) with Cu<sub>A</sub>–N distances of 1.91–2.19 Å and Cu<sub>B</sub>–N distances of 1.90–2.28 Å to N<sub>B</sub> and N<sub>C</sub>. They gave slightly better RSZD<sub>max</sub> scores (1.3 for the MV and oxidised states), but somewhat higher strain energies (170–220 kJ/mol).

Yoshizawa and coworkers have also sometimes suggested structures in which nearby residues coordinate to site A.<sup>[30–32]</sup> Therefore, we tried to enhance the QM system with models of the sidechains Glu-35, Asp-79C or Tyr-374 and then repeated the QM refinement. However, it turned out that these residues were too far away in the crystal structure to coordinate to any of the Cu ions and therefore the structures were closely similar to those obtained without any added residues (Table S1). However, if the QM region was extended with the carbonyl group of His-137, this group was found to coordinate to Cu<sub>B</sub> with Cu–O distances of 2.30–2.52 Å in all three oxidation states as can be seen in Figure S2c. This led to a shortening of the Cu<sub>A</sub>–N<sub>D</sub> bond (2.16–2.19 Å) and a slight elongation of the Cu<sub>A</sub>–N<sub>B</sub> bond (2.11–2.23 Å), but otherwise the structures were similar to the original QM-refined structures. Yet, these structures reproduced the crystallographic data quite poorly, with RSZD<sub>max</sub> scores of 2.6–2.7 (Table S2). The strain energies were also nearly as high as for the original C2W0 structures, 178–226 kJ/mol.

Finally, we instead tried to model site A with a single Cu ion (C1W0 in Tables S1 and S2). This gave structures that were similar to that of Cu<sub>A</sub> in the dinuclear sites. The geometry was distorted square planar with a rather small N<sub>B</sub>–Cu–N<sub>D</sub> angle of 117° (reduced state) to 133° (oxidised state), as can be seen in Figure S3a and S3b. Otherwise, the geometry was quite regular. In the oxidised state, the Cu–N distances were 1.85–2.22 Å, with the longest bond to N<sub>D</sub>. In the reduced state, the three bonds to the sidechains were similar (1.84–2.23 Å), but the bond to N<sub>D</sub> increased to 2.62 Å. If the same structures were optimised with  $w_A = 0$ , the structures became more square-planar with N<sub>B</sub>–Cu–N<sub>D</sub> angles of 139° and 165°. The Cu–N distances become more similar, 1.97–2.10 Å for the oxidised state and 1.96–2.12 (N<sub>A</sub>–N<sub>C</sub>) and 2.33 Å (N<sub>D</sub>) for the reduced state. If the structures were instead optimised in vacuum, the reduced state became tetrahedral with all four Cu–N distances of 1.99–2.05 (N<sub>A</sub>–N<sub>C</sub>) and 2.14 Å (N<sub>D</sub>), whereas the oxidised state became almost perfectly square planar (N<sub>B</sub>–Cu–N<sub>D</sub> angle of 169°) with Cu–N distances of 1.99–2.02 (N<sub>A</sub>–N<sub>C</sub>) and 2.07 Å (N<sub>D</sub>). In all three oxidised

structures, the spin of the Cu ion was  $\sim 0.5 e$ .

There remains some positive difference density on top of the Cu ion in this structure, which was interpreted as an additional Cu ion in the original crystal structure. Yet, it is too close to the Cu ion and with a too low density to be another metal. Therefore, we tried to model it as a water molecule instead (C1W1 in Tables S1 and S2). In the reduced state, the water molecule did not coordinate to Cu (as could be expected from the preference of  $\text{Cu}^+$  for low coordination numbers). Therefore, the structure did not change significantly from that obtained without the water molecule. However, for the oxidised state, the water molecule coordinated with a Cu–O distance of 2.20 Å as can be seen in Figure S4. As a consequence of the increased coordination number, the distance to the other ligands increased by 0.03–0.07 Å. If optimised with QM/MM or in vacuum, the Cu–O distance increased somewhat (2.25–2.31 Å) and the Cu–N distances became more similar.

### The other protomers of the 3RGB structure

Next, we studied site A in the other two protomers of the 3RGB structure. As mentioned in the main text, the structure of these two sites is different from that in the first protomer. This was also reflected in the quantum-refined structures of this site, started from the crystal structure with two Cu ions (C2W0): For all three oxidation states, strongly distorted structures were obtained with  $\text{Cu}_A$  coordinating to His-137 and bidentately to His-33 as can be seen in Figure S5a. His-137 bridges to  $\text{Cu}_B$ , which also interacts with the sidechain of His-139, but with a far-from-ideal, side-on geometry. The corresponding distances are listed in Table S1. The  $\text{RSZD}_{\text{max}}$  scores were worse than in protomer 1, 2.8–2.9, whereas the strain energies were similar, 178–247 kJ/mol (Table S2). Protomer 3 gave similar structures (also described in Tables S1 and S2). However, the  $\text{RSZD}_{\text{max}}$  scores were somewhat smaller, 2.0–2.8, as was the strain energies (160–224 kJ/mol).

To check whether this striking difference in the metal-site geometry is really dictated by the crystallographic data, we used the trifold non-crystallographic symmetry to copy the structure of protomer 1 to site A in protomer 2 and 3 also. However, the structures converged back to the original structures again.

Next, we also optimised Yoshizawa-type dinuclear structures in the other two protomers (Y2W2). They are also presented in Tables S1, S2 and Figure S5b, and it can be seen that the structures are rather similar to those in protomer 1, but with some variation. For protomer 2, these structures fitted the crystallographic data better than the other dinuclear structures with  $\text{RSZD}_{\text{max}}$  scores of 1.9–2.2 and strain energies of 110–144 kJ/mol. However, for protomer 3, they were much worse in terms of  $\text{RSZD}_{\text{max}}$  (2.9–3.2), but the strain energies were still lower (104–160 kJ/mol).

We also optimised the corresponding structures without water molecules (Y2W0). From the results in Tables S1 and S2, it can be seen that they were similar to the corresponding structures with water, except that for  $\text{Cu}_B$  in protomer 3,  $\text{N}_D$  was replaced by  $\text{N}_A$ . In protomer 3, these structures gave lower  $\text{RSZD}_{\text{max}}$  scores than the structures with water, but higher strain energies, whereas both measures were worse for protomer 2.

Next, we tried to model a single Cu ion in both protomers. This gave structures that were similar to the corresponding structures in protomer 1 (Figure S5c). The Cu–N distances (shown in Table S1) were also rather similar. The electron-density maps were also better than those of the dinuclear Cu model, with  $\text{RSZD}_{\text{max}}$  of 1.1–1.7 for protomer 2 and 1.5–2.0 for protomer 3. The strain energies were also much lower than for the dinuclear structures, 37–76 kJ/mol.

Finally, we also tried a single Cu ion with an additional water molecule. It gave results similar to that of protomer 1, with the difference that the water molecule did not coordinate to

Cu in protomer 3. However, in both protomers, the structures without the axial water molecule gave lower RSZD<sub>max</sub> scores and strain energies (Table S2).

### The 3RFR crystal structure

Finally, we considered the 3RFR crystal structure. As mentioned in the introduction, it contains a dinuclear site A only in protomer 1, whereas this site is mononuclear in the other two protomers. Therefore, we performed quantum-refinement also of that site, using the 3RFR crystallographic data. With two Cu ions in the oxidised state (C2W0), the dinuclear site gave a structure similar to that of the first protomer in the 3RGB crystal (Table S1). However, for the reduced state, the structure was distorted and less similar. The side chains of His-137 and 139 coordinate primarily to Cu<sub>A</sub>, whereas both N<sub>A</sub> and N<sub>D</sub> coordinate primarily to Cu<sub>B</sub>, although all atoms except N<sub>B</sub> are within 3 Å also of the other Cu ion. The Cu–Cu distance is 2.24 Å. These structures fitted the crystallographic raw data quite poorly with RSZD<sub>max</sub> scores of 1.6–1.9 and very high strain energies, 292–357 kJ/mol.

However, much more reasonable structures were obtained with a single Cu ion in this site. Both the reduced and oxidised states gave almost perfectly square-planar structures with N<sub>B</sub>–Cu–N<sub>D</sub> angles of 171–177°. The Cu–N distances were similar to those of the 3RGB structure, 1.94–2.40 Å for the reduced state and 1.96–2.15 Å for the oxidised state (Table S1). These structures also fitted the experimental data better, with RSZD<sub>max</sub> = 1.3–1.4 and strain energies of 32 (oxidised state) or 88 kJ/mol (reduced state). Structures with a coordinated water molecule could also be obtained for both oxidation states (Cu–O distances of 2.43–2.50 Å). However, they gave larger RSZD<sub>max</sub> scores of 2.3 and 2.6.

For the other two protomers, the original crystal structure contained mononuclear sites. This was confirmed by the quantum-refinement, which gave structures similar to the other mononuclear sites in the 3RGB or 3RFR structures (Tables S1 and S2). However, no structures were obtained with a bound water molecule, not even for the oxidised state. The structures fitted the experimental data appreciably better than for protomer 1, with RSZD<sub>max</sub> = 0.4–0.9 without the water molecule. On the other hand, the strain energies were similar, 37–47 kJ/mol for the oxidised state and 89–101 kJ/mol for the reduced state.

### Discussion of different RSZD scores

In this study, we have used quantum refinement to re-refine the putative dinuclear Cu site A in two crystal structures of pMMO. We have tried several different dinuclear structures, as well as a mononuclear structure in all three protomers in both enzymes and also tried to add one or two extra water molecules. We have observed some variation among the two crystal structures and the three protomers.

In terms of the strain energies, our results are quite conclusive (Table 1 in the main article): The mononuclear models always give lower strain energies than the dinuclear models (37–85 kJ/mol, compared to 104–300 kJ/mol). For the same crystal and protomer, the best mononuclear structure always give a 63–85 kJ/mol lower strain energy than the best dinuclear structure. This confirms the impression that the dinuclear structures are not reasonable, even after the quantum refinement.

The RSZD<sub>max</sub> results are slightly less conclusive (Tables 1 and S2). For the 3RFR structure and protomers 2 and 3 of the 3RGB structure, the mononuclear sites still give the lowest scores (1.3 compared to 1.6 in 3RFR, 1.1 compared to 1.9 in protomer 2 and 1.5 compared to 1.8 for protomer 3 of 3RGB). However, for protomer 1 in 3RGB, the lowest scores are actually obtained for the Y2W0 structure (1.3, compared to 1.5 for the best mononuclear site). On the other hand, it is not entirely clear how to compare RSZD scores

between sites of different composition. The RSZD scores are calculated for individual residues (viz. for His-33, 137 and 139, as well as for the Cu ions and water molecules; the individual RSZD results are shown in Table S2). These are not the same for all systems and they do not cover the same space in the various structures. Moreover, it is unclear how to combine 4–7 RSZD results to a single score in an unambiguous manner: We have used the maximum value ( $\text{RSZD}_{\text{max}}$ , called simply RSZD in the main article), but other measures are also conceivable. Table S2 shows two additional scores, obtained from the sum or the average. In fact, the mononuclear site gives the lowest RSZD score if the sum is considered (3.1, compared to 3.4), whereas the Y2W2 structure gives the best results if the average is considered (0.5 compared to 0.7).

A third argument against a dinuclear site is the large variation of the dinuclear structures in the various protomers and crystals: The geometries vary extensively (cf. Table S1) and the best one also varies between the crystals and protomers (the Y2W0 structure is best in protomer 1, the Y2W2 in protomer 2, whereas C2W0 is best in protomer 3 of the 3RGB structures).

Taken all results together, we find no conclusive evidence that the crystal structures of pMMO show a dinuclear Cu site. Instead, a mononuclear site fits the experimental data at least as well and it also gives chemically much more reasonable structures that are similar in both crystals and all protomers. Such a site is more similar to the mononuclear Cu site in the lytic polysaccharide monooxygenases, although it contains an additional histidine residue and lacks the nearby tyrosine residue.<sup>[33]</sup> The main evidence for a dinuclear site comes from EXAFS investigations, showing a striking reproducibility of the Cu–Cu interaction in pMMOs from four different methanotrophs.<sup>[10,34–36]</sup> One possibility is that the dicopper site detected by EXAFS is disrupted upon crystallization. On the other hand, EXAFS fits are known to give multiple local minima, so that different structures can give equally good fits.<sup>[37,38]</sup> This will be examined in future studies by a similar combination of computational and EXAFS methods.<sup>[39]</sup>

## Reaction mechanism

To provide a further check of the suggested mononuclear Cu site, we studied the reaction of the suggested mononuclear active site with a molecule of methane. Yoshizawa and Shiota have already studied with QM method putative reaction mechanisms of mono- and dinuclear Cu sites in pMMO.<sup>[30]</sup> However, their mononuclear model came from site B in the protein and therefore contained two His side chains and an acetate group and no His brace or amino group. Therefore, we repeated their study using our preferred mononuclear site in Figure 4 in the main article, i.e. with three His side chains, one of which is connected to a terminal amino group, as is shown in Figure 6 in the main article. Geometries were optimised at the TPSS-D3/def2-SV(P) level of theory in gas phase. Then, more accurate energies were calculated with the def2-TZVDP basis set with both the TPSS-D3 and B3LYP-D3 methods in a COSMO continuum solvent with a dielectric constant of 4. All energies are given in Table S3. Reported energies in Figure 6 and in the text are B3LYP-D3/def2-TZVPD energies, including the zero-point energy, obtained from frequencies at the TPSS-D3/def2-SV(P) level of theory.

Following the previous study, we started with a Cu(III) ion with an oxo ligand (or equivalently  $\text{Cu(II)}-\text{O}^{\bullet-}$ ; net charge +1; called RS in Figure 6). All structures were studied in both the singlet and triplet states. In both cases, there was 0.5 spin on the Cu ion, 0.05–0.06 spins on each His ligand and the remainder on O (0.7 for the singlet and 1.3 for the triplet). In the singlet, the O spin was opposite to that of the other atoms and groups. Unlike the study by Yoshizawa and Shiota,<sup>[30]</sup> the two states were not degenerate; instead the triplet was 85 kJ/mol more stable than the singlet. Next, a methane molecule was added to the complex, forming a weak hydrogen bond to the oxo group (2.58 Å CH–O distance; R). It had nearly the

same energy as the RS structure (plus a free methane molecule).

A transition state (TS1) for the transfer of one of the hydrogen atoms of the methane molecule could be located. It had a CH–O distance of 1.17 Å and was 22 kJ/mol higher in energy than RS for the triplet. It is characterised by a single imaginary frequency of  $1475i\text{ cm}^{-1}$ , similar to that found by Yoshizawa and Shiota ( $1445i\text{ cm}^{-1}$ ).<sup>[30]</sup> This transition state leads to an intermediate with Cu–OH interacting with a methyl radical (Im1). It had a O–H distance of 0.99 Å and a OH–C distance of 2.18 Å and it was 16 kJ/mol more stable than RS. The Cu ion still had 0.5 spin, whereas 0.3 spin resided on OH and there was 0.95 spin on the methyl radical.

This intermediate could rearrange essentially barrierless to a second intermediate (Im2) in which the methyl radical also binds to the Cu ion. In this intermediate, the spins on Cu and OH have increased slightly, whereas that on the methyl radical has decreased strongly to 0.6. For the triplet state, Im2 is 10 kJ/mol less stable than Im1. However, for the singlet-state structures (which up to Im1 has been 75–150 kJ/mol less stable than the triplet states), Im2 is strongly stabilised and actually becomes 46 kJ/mol more stable than the triplet state (and 52 kJ/mol more stable than <sup>3</sup>RS). Therefore, we suggest, in accordance with the study of Yoshizawa and Shiota,<sup>[30]</sup> that the spin state changes from triplet to singlet at this point. <sup>1</sup>Im2 is a closed-shell singlet, indicating a Cu(III)–OH<sup>−</sup>–CH<sub>3</sub><sup>−</sup> complex.

Finally, the methanol product (P) can form by a recombination of OH and the methyl group. The corresponding transition state (TS2) has a rather complicated structure because both groups are still bound to Cu. The C–O distance is 1.91 Å and the imaginary frequency is  $396i\text{ cm}^{-1}$ , slightly smaller than that obtained by Yoshizawa and Shiota ( $473i\text{ cm}^{-1}$ ).<sup>[30]</sup> It is still a closed-shell species and it is 53 kJ/mol higher in energy than <sup>1</sup>Im2. In the product, methanol has dissociated from the Cu(I) ion and is 217 kJ/mol more stable than the starting point (<sup>3</sup>RS).

From the energy components in Table S3, it can be seen that the effect of an increase in the basis set from def2-SV(P) to def2-TZVPD (for the TPSS-D3 method) is quite small for the triplet state (up to 17 kJ/mol, in general reducing the relative energies), whereas it is larger for the R, TS1, and Im1 states (up to 67 kJ/mol), increasing the energies. Likewise, the effect of changing the DFT functional from TPSS to B3LYP has a relatively small effect on the triplet energies (up to 24 kJ/mol, increasing the energies), but a much larger effect on the singlet energies (again up to 67 kJ/mol), although it is mainly an effect of decreasing the relative energy of all open-shell singlet states by 50–67 kJ/mol. Thus, the singlet and triplet states are much closer in energy at the TPSS level of theory. The zero-point energy has a rather small effect on all energies, up to 17 kJ/mol with a varying sign (but nearly the same energy for the singlet and triplet states).

## References

- [1] U. Ryde, L. Olsen, K. Nilsson, *J. Comput. Chem.* **2002**, *23*, 1058–1070.
- [2] U. Ryde, K. Nilsson, *J. Am. Chem. Soc.* **2003**, *125*, 14232–14233.
- [3] G. J. Kleywegt, T. A. Jones, *Acta Crystallogr. Sect. D Biol. Crystallogr.* **1998**, *54*, 1119–1131.
- [4] N. S. Pannu, R. J. Read, *Acta Crystallogr. Sect. A Found. Crystallogr.* **1996**, *A52*, 659–668.
- [5] P. D. Adams, N. S. Pannu, R. J. Read, A. T. Brünger, *Proc. Natl. Acad. Sci. U. S. A.* **1997**, *94*, 5018–5023.
- [6] F. Furche, R. Ahlrichs, C. Hättig, W. Klopper, M. Sierka, F. Weigend, *Wiley Interdiscip. Rev. Comput. Mol. Sci.* **2014**, *4*, 91–100.
- [7] A. T. Brünger, P. D. Adams, G. M. Clore, W. L. Delano, P. Gros, R. W. Grosse-kunstleve, J. Jiang, J. Kuszewski, M. Nilges, N. S. Pannu, et al., *Acta Crystallogr. Sect.*

*D Biol. Crystallogr.* **1998**, *54*, 905–921.

- [8] A. T. Brunger, *Nat. Protoc.* **2007**, *2*, 2728–33.
- [9] R. A. Engh, R. Huber, *Acta Crystallogr. Sect. A* **1991**, *47*, 392–400.
- [10] S. M. Smith, S. Rawat, J. Telser, B. M. Hoffman, T. L. Stemmler, A. C. Rosenzweig, *Biochemistry* **2011**, *269*, 26344–26348.
- [11] P. V Afonine, W. Ralf, J. J. Headd, C. Thomas, *Acta Crystallogr. Sect. D Biol. Crystallogr.* **2012**, *68*, 352–367.
- [12] I. J. Tickle, *Acta Crystallogr. Sect. D Biol. Crystallogr.* **2012**, *68*, 454–467.
- [13] M. D. Winn, C. Charles, K. D. Cowtan, E. J. Dodson, A. G. W. Leslie, A. McCoy, J. Stuart, N. Garib, H. R. Powell, J. Randy, *Acta Crystallogr. Sect. D Biol. Crystallogr.* **2011**, *4449*, 235–242.
- [14] U. Ryde, *Dalton Trans.* **2007**, 607–625.
- [15] J. Tao, J. P. Perdew, V. N. Staroverov, G. E. Scuseria, *Phys. Rev. Lett.* **2003**, *91*, 146401.
- [16] A. Schäfer, H. Horn, R. Ahlrichs, *J. Chem. Phys.* **1992**, *97*, 2571–2577.
- [17] K. Eichkorn, O. Treutler, H. Öhm, M. Häser, R. Ahlrichs, *Chem. Phys. Lett.* **1995**, *240*, 283–289.
- [18] K. Eichkorn, F. Weigend, O. Treutler, R. Ahlrichs, *Theor. Chem. Acc.* **1997**, *97*, 119–124.
- [19] S. Grimme, J. Antony, S. Ehrlich, H. Krieg, *J. Chem. Phys.* **2010**, *132*, 154104 (19 pages).
- [20] S. Grimme, S. Ehrlich, L. Goerigk, *J. Comput. Chem.* **2011**, *32*, 1456–1465.
- [21] F. Weigend, R. Ahlrichs, *Phys. Chem. Chem. Phys.* **2005**, *7*, 3297–305.
- [22] D. Rappoport, F. Furche, *J. Chem. Phys.* **2010**, *133*, 134105 (11 pages).
- [23] A. D. Becke, *Phys. Rev. A* **1988**, *38*, 3098–3100.
- [24] C. Lee, W. Yang, R. G. Parr, *Phys. Rev. B* **1988**, *37*, 785–789.
- [25] A. D. Becke, **2005**, *5648*, 5648–5652.
- [26] A. Klamt, G. Schüürmann, *J. Chem. Soc. - Perkin Trans. 2* **1993**, 799–805.
- [27] A. Schäfer, A. Klamt, D. Sattel, J. C. W. Lohrenz, F. Eckert, *Phys. Chem. Chem. Phys.* **2000**, *2*, 2187–2193.
- [28] A. Klamt, V. Jonas, T. Bürger, J. C. W. Lohrenz, *J. Phys. Chem. A* **1998**, *102*, 5074–5085.
- [29] E. Sigfridsson, U. Ryde, *J. Comput. Chem.* **1998**, *19*, 377–395.
- [30] K. Yoshizawa, Y. Shiota, *J. Am. Chem. Soc.* **2006**, *128*, 9873–9881.
- [31] Y. Shiota, K. Yoshizawa, *Inorg. Chem.* **2009**, *48*, 838–845.
- [32] S. Itoyama, K. Doitomi, T. Kamachi, Y. Shiota, K. Yoshizawa, *Inorg. Chem.* **2016**, *55*, 2771–2775.
- [33] W. T. Beeson, V. V. Vu, E. A. Span, C. M. Phillips, M. A. Marletta, *Annu. Rev. Biochem.* **2014**, *84*, 923–946.
- [34] R. L. Lieberman, D. B. Shrestha, P. E. Doan, B. M. Hoffman, T. L. Stemmler, A. C. Rosenzweig, *Proc. Natl. Acad. Sci. U. S. A.* **2003**, *100*, 3820–3825.
- [35] A. S. Hakemian, K. C. Kondapalli, J. Telser, B. M. Hoffman, T. L. Stemmler, A. C. Rosenzweig, *Biochemistry* **2008**, *47*, 6793–6801.
- [36] R. L. Lieberman, K. C. Kondapalli, D. B. Shrestha, A. S. Hakemian, S. M. Smith, J. Telser, J. Kuzelka, R. Gupta, A. S. Borovik, S. J. Lippard, et al., *Inorg. Chem.* **2006**, *45*, 8372–8381.
- [37] X. Li, P. E. M. Siegbahn, U. Ryde, *Proc. Natl. Acad. Sci. U. S. A.* **2015**, *112*, 3979–84.
- [38] Y. W. Hsiao, U. Ryde, *Inorganica Chim. Acta* **2006**, *359*, 1081–1092.
- [39] Y. W. Hsiao, Y. Tao, J. E. Shokes, R. A. Scott, U. Ryde, *Phys. Rev. B - Condens. Matter Mater. Phys.* **2006**, *74*, 1–17.

**Table S1.** Cu–ligand distances (Å) in the various complexes. The results for different crystal structures and protomers are presented in separated sections of the table. The structures are described with a four-letter code, giving the number of Cu ions (C2 and C1; Y2 represent Yoshizawa-like structures with two Cu ions, such as those in Figure S2) and the number of water molecules, W2, W1 or W0 (the Glu35, Asp79, Tyr374 and His137 structures of 3RGB, subunit A all represent C2W0 structures, but with enhanced QM regions). The methods are quantum refinement (R), QM/MM (Q; i.e. quantum refinement with  $w_A = 0$ ) and vacuum optimisations (V). State is the oxidation state of the Cu ion(s), reduced (Red; one or two  $\text{Cu}^{\text{I}}$ ), oxidised (Ox; one or two  $\text{Cu}^{\text{II}}$ ) or mixed valence (MV;  $\text{Cu}^{\text{I}} + \text{Cu}^{\text{II}}$ ). Cu–ligand distances are reported only if they were shorter than 3.0 Å.  $N_A$ ,  $N_B$  and  $N_C$  are the coordinating sidechain atoms of His-33, His-137 and His-139, respectively.  $N_D$  is the backbone (amino-terminal) N atom or His-33.  $O_1$  and  $O_2$  are the O atoms of the water molecules that are present in some structures. In the structure with the QM region enhanced with the backbone of His137,  $O_1$  represents the carbonyl oxygen.

| Structure        | Method            | State | Distance to Cu <sub>A</sub> |                |                |                |                |                |                | Distance to Cu <sub>B</sub> |                |                |                |                |                |      |      |
|------------------|-------------------|-------|-----------------------------|----------------|----------------|----------------|----------------|----------------|----------------|-----------------------------|----------------|----------------|----------------|----------------|----------------|------|------|
|                  |                   |       | Cu <sub>B</sub>             | N <sub>A</sub> | N <sub>B</sub> | N <sub>C</sub> | N <sub>D</sub> | O <sub>1</sub> | O <sub>2</sub> | N <sub>A</sub>              | N <sub>B</sub> | N <sub>C</sub> | N <sub>D</sub> | O <sub>1</sub> | O <sub>2</sub> |      |      |
| 3RGB, protomer 1 |                   |       |                             |                |                |                |                |                |                |                             |                |                |                |                |                |      |      |
| C2W0             | R                 | Red   | 2.21                        | 2.34           | 2.07           | 2.63           | 2.25           |                |                | 2.02                        |                | 2.03           |                |                |                |      |      |
|                  |                   | MV    | 2.25                        | 2.07           | 2.10           | 2.06           | 2.24           |                |                | 2.08                        |                | 2.89           |                |                |                |      |      |
|                  |                   | Ox    | 2.25                        | 2.05           | 2.15           | 2.06           | 2.30           |                |                | 2.13                        |                | 2.93           |                |                |                |      |      |
|                  | Q                 | Red   | 2.46                        | 2.76           | 2.01           |                | 2.08           |                |                | 1.89                        |                | 1.89           |                |                |                |      |      |
|                  |                   | MV    | 2.69                        | 2.15           | 2.03           | 2.00           | 2.09           |                |                | 1.94                        |                |                |                |                |                |      |      |
|                  |                   | Ox    | 5.49                        | 2.05           | 2.13           | 2.05           | 2.09           |                |                |                             |                |                |                |                |                |      |      |
|                  | V                 | Red   | 2.54                        | 2.72           | 1.91           |                | 1.96           |                |                | 1.90                        |                | 1.89           |                |                |                |      |      |
|                  |                   | MV    | 3.63                        | 2.05           | 2.06           | 2.00           | 2.07           |                |                | 2.67                        | 2.64           |                |                |                |                |      |      |
|                  |                   | Ox    | 5.67                        | 2.09           | 2.06           | 2.09           | 2.07           |                |                |                             |                |                |                |                |                |      |      |
|                  | Y2W0a             | Q     | Red                         | 2.35           | 1.97           | 2.07           |                | 2.09           |                |                             |                | 1.97           | 1.87           |                |                |      |      |
|                  |                   |       | MV                          | 2.43           | 1.97           | 2.08           |                | 2.07           |                |                             |                | 1.99           | 1.86           |                |                |      |      |
|                  |                   |       | Ox                          | 2.45           | 2.01           | 2.07           |                | 2.08           |                |                             |                | 1.99           | 1.87           |                |                |      |      |
|                  |                   | R     | Red                         | 2.27           | 2.01           | 2.01           | 1.93           |                |                |                             | 2.09           |                |                | 1.98           |                |      |      |
|                  |                   |       | MV                          | 2.59           | 1.91           | 2.17           | 2.09           | 2.02           |                |                             |                | 2.15           | 2.11           |                |                |      |      |
|                  |                   |       | Ox                          | 3.54           | 1.98           | 2.03           | 2.03           | 2.02           |                |                             |                |                |                |                |                |      |      |
| V                |                   | Red   | 2.41                        | 2.00           | 2.02           |                | 2.01           |                |                |                             | 1.97           | 1.90           |                |                |                |      |      |
|                  |                   | Y2W2  | R                           | Red            | 2.51           | 2.01           | 2.06           | 1.99           | 2.99           | 2.23                        |                | 2.17           |                |                | 2.02           | 2.08 | 2.07 |
|                  |                   |       |                             | MV             | 2.51           | 1.94           | 2.07           | 2.12           | 1.98           | 2.53                        |                |                | 2.19           | 2.09           |                |      | 2.04 |
| Ox               | 2.51              |       |                             |                | 2.19           | 2.09           |                | 2.04           |                | 1.94                        | 2.07           | 2.12           | 1.98           |                | 2.53           |      |      |
| V                | Ox <sub>alt</sub> |       | 2.60                        | 1.98           | 2.06           | 2.13           | 1.98           | 2.52           |                |                             | 2.19           | 2.07           |                |                | 2.02           |      |      |
|                  | Red               |       | 2.56                        | 1.98           | 2.08           | 1.96           |                |                |                | 2.50                        |                |                | 1.95           |                | 1.94           |      |      |
|                  | MV                |       | 2.46                        |                | 2.15           | 1.96           |                | 2.06           | 2.18           | 1.98                        | 2.01           |                | 2.00           |                | 2.89           |      |      |
| Y2W0             | R                 |       | Ox                          | 3.66           |                |                | 2.08           |                | 2.00           | 2.09                        | 2.06           | 2.00           | 2.39           | 2.02           |                |      |      |
|                  |                   |       | Red                         | 2.18           | 1.94           | 2.19           |                | 1.95           |                |                             |                | 1.90           | 1.83           |                |                |      |      |
|                  |                   |       | MV                          | 2.42           | 1.91           | 2.08           | 2.13           | 2.00           |                |                             |                | 2.21           | 2.11           |                |                |      |      |
| Glu35            | R                 | Ox    | 2.47                        | 1.98           | 2.05           | 2.13           | 2.00           |                |                |                             | 2.28           | 2.11           |                |                |                |      |      |
|                  |                   | V     | Red                         | 2.41           | 2.00           | 2.02           |                | 2.01           |                |                             |                | 1.97           | 1.90           |                |                |      |      |
|                  |                   |       | MV                          | 3.93           | 1.98           | 2.10           | 2.10           | 2.06           |                |                             |                | 2.85           | 2.83           |                |                |      |      |
|                  | Ox                | 3.89  | 2.12                        | 2.07           | 2.08           | 2.06           |                |                |                | 2.89                        | 2.83           |                |                |                |                |      |      |
|                  |                   | Asp79 | R                           | Red            | 2.21           | 2.45           | 2.09           | 2.61           | 2.15           |                             |                | 2.01           |                | 2.01           | 2.94           |      |      |
| MV               | 2.21              |       |                             | 2.34           | 2.07           | 2.62           | 2.17           |                |                |                             | 2.03           |                | 2.03           | 2.94           |                |      |      |
| Ox               | 2.20              |       |                             | 2.26           | 2.07           | 2.57           | 2.16           |                |                |                             | 2.05           |                | 2.08           | 2.95           |                |      |      |
| Asp79            | R                 | Red   | 2.21                        | 2.34           | 2.07           | 2.64           | 2.25           |                |                |                             | 2.01           |                | 2.02           |                |                |      |      |
|                  |                   | MV    | 2.21                        | 2.34           | 2.07           | 2.64           | 2.25           |                |                |                             | 2.01           |                | 2.02           |                |                |      |      |
|                  |                   | Ox    | 2.25                        | 2.09           | 2.10           | 2.09           | 2.25           |                |                |                             | 2.06           |                | 2.79           |                |                |      |      |

|                  |   |     |      |      |      |      |      |      |      |      |      |      |
|------------------|---|-----|------|------|------|------|------|------|------|------|------|------|
| Tyr374           | R | Red | 2.21 | 2.35 | 2.06 | 2.64 | 2.24 |      | 2.01 | 2.02 |      |      |
|                  |   | MV  | 2.21 | 2.35 | 2.06 | 2.64 | 2.24 |      | 2.01 | 2.02 |      |      |
|                  |   | Ox  | 2.21 | 2.27 | 2.06 | 2.62 | 2.24 |      | 2.03 | 2.04 |      |      |
| His137           | R | Red | 2.25 | 2.23 | 2.11 | 2.49 | 2.19 |      | 2.09 | 2.19 | 2.52 |      |
|                  |   | MV  | 2.30 | 2.01 | 2.21 | 2.03 | 2.16 |      | 2.14 | 2.97 | 2.30 |      |
|                  |   | Ox  | 2.28 | 2.01 | 2.23 | 2.05 | 2.18 |      | 2.15 | 2.94 | 2.39 |      |
|                  | V | Red | 2.49 | 2.90 | 1.92 |      | 1.98 |      | 1.93 | 1.93 | 2.13 |      |
|                  |   | MV  | 2.42 |      | 1.97 | 2.02 | 2.03 | 2.52 | 1.88 |      | 2.91 | 1.89 |
|                  |   | Ox  | 2.55 |      | 1.99 | 2.07 | 2.05 | 2.31 | 1.91 |      | 2.90 | 1.90 |
| C1W0             | R | Red |      | 1.84 | 2.23 | 1.90 | 2.62 |      |      |      |      |      |
|                  |   | Ox  |      | 1.85 | 2.13 | 1.94 | 2.22 |      |      |      |      |      |
|                  | Q | Red |      | 1.96 | 2.12 | 2.02 | 2.33 |      |      |      |      |      |
|                  |   | Ox  |      | 1.97 | 2.06 | 2.01 | 2.10 |      |      |      |      |      |
|                  | V | Red |      | 2.01 | 1.99 | 2.05 | 2.14 |      |      |      |      |      |
|                  |   | Ox  |      | 1.99 | 2.02 | 2.02 | 2.07 |      |      |      |      |      |
| C1W1             | R | Red |      | 1.87 | 2.25 | 1.93 | 2.55 | 3.09 |      |      |      |      |
|                  |   | Ox  |      | 1.89 | 2.16 | 1.99 | 2.29 | 2.20 |      |      |      |      |
|                  | Q | Ox  |      | 2.00 | 2.08 | 2.03 | 2.09 | 2.25 |      |      |      |      |
|                  | V | Red |      | 2.28 | 2.01 | 2.02 | 2.06 |      |      |      |      |      |
|                  |   | Ox  |      | 2.02 | 2.03 | 2.04 | 2.08 | 2.31 |      |      |      |      |
| 3RGB, protomer 2 |   |     |      |      |      |      |      |      |      |      |      |      |
| C2W0             | R | Red | 2.29 | 1.85 |      | 2.12 | 2.18 |      | 1.97 | 2.27 |      |      |
|                  |   | MV  | 2.36 | 1.84 |      | 2.12 | 2.13 |      | 1.95 | 2.23 |      |      |
|                  |   | Ox  | 2.40 | 1.86 |      | 2.13 | 2.13 |      | 1.96 | 2.25 |      |      |
|                  | V | Red | 2.42 | 1.93 |      | 2.01 | 2.09 |      | 1.90 | 1.97 |      |      |
|                  |   | MV  | 2.55 | 1.94 |      | 2.04 | 2.07 |      | 1.94 | 1.96 |      |      |
|                  |   | Ox  | 3.62 | 2.00 |      | 2.10 | 2.07 |      | 1.94 | 2.02 |      |      |
| Y2W2             | R | Red | 2.51 | 1.92 | 2.06 | 2.03 | 2.34 | 2.83 | 2.88 | 2.47 | 1.95 | 1.94 |
|                  |   | MV  | 2.96 | 1.89 | 2.07 | 2.05 | 2.18 | 2.28 | 2.31 | 2.14 | 1.93 |      |
|                  |   | Ox  | 3.00 | 1.92 | 2.07 | 2.07 | 2.19 | 2.30 | 2.28 | 2.14 | 1.93 |      |
|                  | V | Red | 2.59 | 2.34 | 1.93 |      | 1.99 | 2.96 |      | 1.91 | 2.16 | 1.95 |
|                  |   | MV  | 2.47 | 1.93 |      | 1.97 | 2.08 | 2.83 | 1.93 | 2.49 | 2.12 | 2.03 |
|                  |   | Ox  | 2.96 | 2.07 | 2.10 | 2.24 | 2.07 |      | 2.21 | 2.07 | 2.04 | 2.05 |
| Y2W0             | R | Red | 2.45 | 1.87 | 2.26 | 1.96 | 2.30 |      | 2.39 | 2.09 |      |      |
|                  |   | MV  | 2.92 | 1.87 | 2.07 | 2.01 | 2.15 |      | 2.45 | 2.24 |      |      |
|                  |   | Ox  | 3.12 | 1.93 | 2.05 | 2.01 | 2.13 |      | 2.59 | 2.36 |      |      |
|                  | V | Red | 2.41 | 1.92 |      | 2.01 | 2.10 |      | 2.75 | 2.02 |      |      |
|                  |   | MV  | 3.89 | 1.98 | 2.10 | 2.10 | 2.07 |      | 2.84 | 2.82 |      |      |
|                  |   | Ox  | 3.90 | 2.12 | 2.07 | 2.09 | 2.06 |      | 2.90 | 2.83 |      |      |
| C1W0             | R | Red |      | 1.88 | 2.13 | 1.95 | 2.49 |      |      |      |      |      |
|                  |   | Ox  |      | 1.89 | 2.04 | 2.01 | 2.20 |      |      |      |      |      |
|                  | V | Red |      | 2.01 | 1.98 | 2.05 | 2.14 |      |      |      |      |      |
|                  |   | Ox  |      | 1.99 | 2.02 | 2.02 | 2.07 |      |      |      |      |      |
| C1W1             | R | Ox  |      | 1.91 | 2.02 | 2.02 | 2.21 | 2.37 |      |      |      |      |
|                  | V | Ox  |      | 2.02 | 2.03 | 2.04 | 2.08 | 2.34 |      |      |      |      |
| 3RGB, protomer 3 |   |     |      |      |      |      |      |      |      |      |      |      |
| C2W0             | R | Red | 2.29 | 1.98 |      | 2.24 | 2.03 |      | 1.95 | 2.04 |      |      |
|                  |   | MV  | 2.30 | 1.95 |      | 2.17 | 2.00 |      | 1.93 | 2.06 |      |      |
|                  |   | Ox  | 2.33 | 1.98 |      | 2.15 | 2.00 |      | 1.93 | 2.08 |      |      |
|                  | V | Red | 2.41 | 1.93 |      | 2.01 | 2.09 |      | 1.90 | 1.97 |      |      |
|                  |   | MV  | 2.56 | 1.94 |      | 2.03 | 2.07 |      | 1.89 | 1.95 |      |      |
|                  |   | Ox  | 3.62 | 2.00 |      | 2.10 | 2.07 |      | 1.94 | 2.02 |      |      |
| Y2W2             | R | Red | 2.47 | 2.21 | 2.04 | 2.01 | 2.21 | 2.89 | 2.93 | 2.65 | 1.94 | 1.92 |
|                  |   | MV  | 3.94 | 2.00 | 2.02 | 2.01 | 2.11 |      |      | 2.72 | 1.89 |      |
|                  |   | Ox  | 3.93 | 2.07 | 2.01 | 2.01 | 2.11 |      |      | 2.74 | 1.92 |      |

|                  |   |     |      |      |      |      |      |      |      |      |      |      |      |      |
|------------------|---|-----|------|------|------|------|------|------|------|------|------|------|------|------|
| Y2W0             | V | Red | 2.59 | 2.32 | 1.93 |      | 1.99 | 2.95 | 1.91 | 2.17 | 1.95 |      |      |      |
|                  |   | MV  | 4.76 | 1.99 | 2.02 | 2.10 | 2.04 |      |      |      |      |      |      |      |
|                  |   | Ox  | 4.93 | 2.08 | 2.05 | 2.10 | 2.04 |      |      |      |      |      |      |      |
|                  | R | Red | 2.45 | 2.04 | 2.35 | 1.95 | 2.19 | 2.38 |      |      |      | 2.06 |      |      |
|                  |   | MV  | 2.77 | 2.01 | 2.08 | 2.00 | 2.11 |      |      |      |      |      | 2.36 | 2.23 |
|                  |   | Ox  | 2.86 | 2.09 | 2.06 | 1.99 | 2.11 |      |      |      |      |      |      |      |
|                  | V | Red | 2.42 | 1.93 |      | 2.01 | 2.09 | 1.90 |      |      |      | 1.97 |      |      |
|                  |   | MV  | 3.90 | 1.98 | 2.11 | 2.10 | 2.07 |      |      |      |      |      | 2.84 | 2.82 |
|                  |   | Ox  | 3.90 | 2.12 | 2.07 | 2.08 | 2.06 |      |      |      |      |      |      |      |
| C1W0             | R | Red |      | 2.03 | 2.19 | 1.92 | 2.27 |      |      |      |      |      |      |      |
|                  |   | Ox  |      | 2.00 | 2.02 | 1.97 | 2.12 |      |      |      |      |      |      |      |
|                  | V | Red |      | 2.01 | 1.99 | 2.05 | 2.14 |      |      |      |      |      |      |      |
| Ox               |   |     | 1.99 | 2.02 | 2.02 | 2.07 |      |      |      |      |      |      |      |      |
| C1W1             | R | Ox  |      | 2.02 | 2.01 | 1.98 | 2.12 |      |      |      | 3.05 |      |      |      |
|                  | V | Ox  |      | 2.02 | 2.03 | 2.04 | 2.08 |      |      |      | 2.34 |      |      |      |
| 3RFR, protomer 1 |   |     |      |      |      |      |      |      |      |      |      |      |      |      |
| C2W0             | R | Red | 2.24 | 2.73 | 2.06 | 1.92 | 2.93 |      |      |      | 2.09 | 2.79 | 2.34 |      |
|                  |   | MV  | 2.34 | 2.23 | 2.07 | 1.92 | 2.54 |      |      |      |      |      |      | 2.36 |
|                  |   | Ox  | 2.32 | 2.34 | 2.11 | 1.93 | 2.70 | 2.32 | 2.94 | 2.17 |      |      |      |      |
| C1W0             | R | Red |      | 2.12 | 2.26 | 1.94 | 2.39 |      |      |      |      |      |      |      |
|                  |   | Ox  |      | 2.05 | 2.09 | 1.96 | 2.15 |      |      |      |      |      |      |      |
| C1W1             | R | Red |      | 2.06 | 2.19 | 1.92 | 2.76 | 2.43 |      |      |      |      |      |      |
|                  |   | Ox  |      | 2.04 | 2.08 | 1.96 | 2.14 | 2.50 |      |      |      |      |      |      |
| 3RFR, protomer 2 |   |     |      |      |      |      |      |      |      |      |      |      |      |      |
| C1W0             | R | Red |      | 2.12 | 2.08 | 2.06 | 2.56 |      |      |      |      |      |      |      |
|                  |   | Ox  |      | 2.01 | 2.01 | 2.03 | 2.30 |      |      |      |      |      |      |      |
| C1W1             | R | Ox  |      | 2.02 | 2.01 | 2.03 | 2.28 |      |      |      |      |      |      |      |
| 3RFR, protomer 3 |   |     |      |      |      |      |      |      |      |      |      |      |      |      |
| C1W0             | R | Red |      | 2.00 | 2.31 | 1.96 | 2.34 |      |      |      |      |      |      |      |
|                  |   | Ox  |      | 2.00 | 2.10 | 1.96 | 2.16 |      |      |      |      |      |      |      |
| C1W1             | R | Ox  |      | 2.01 | 2.08 | 1.96 | 2.15 |      |      |      |      |      |      |      |

**Table S2.** RSZD scores for each ligand in the active site, together with the maximum, sum and average. The last two columns give  $R_{\text{free}}$  and  $R$  of the structures. PM, Struct and State are the protomer, the structure and the oxidation state of site A.

| PM                     | Struct | State             | RSZD |      |      |                 |                 |                  |                  |     |      |     | $R_{\text{free}}$ | $R$    |
|------------------------|--------|-------------------|------|------|------|-----------------|-----------------|------------------|------------------|-----|------|-----|-------------------|--------|
|                        |        |                   | H33  | H137 | H139 | Cu <sub>A</sub> | Cu <sub>B</sub> | Wat <sub>1</sub> | Wat <sub>2</sub> | Max | Sum  | Av  |                   |        |
| 3RGB crystal structure |        |                   |      |      |      |                 |                 |                  |                  |     |      |     |                   |        |
| 1                      | start  |                   | 1.0  | 2.0  | 0.8  | 4.7             |                 |                  |                  | 4.7 | 8.5  | 2.1 |                   |        |
|                        | C2W2   | Red               | 0.2  | 2.0  | 0.8  | 2.1             | 1.5             |                  |                  | 2.1 | 6.6  | 1.3 | 0.2831            | 0.2627 |
|                        |        | MV                | 0.4  | 1.8  | 0.8  | 0.9             | 1.9             |                  |                  | 1.9 | 5.8  | 1.2 | 0.2832            | 0.2627 |
|                        |        | Ox                | 0.5  | 1.9  | 0.9  | 0.8             | 2.1             |                  |                  | 2.1 | 6.2  | 1.2 | 0.2832            | 0.2627 |
|                        | Y2W2   | Red               | 1.3  | 1.6  | 0.4  | 0.0             | 0.8             | 0.4              | 3.2              | 3.2 | 7.7  | 1.1 | 0.2879            | 0.2437 |
|                        |        | MV                | 1.0  | 1.5  | 0.5  | 0.1             | 0.6             | 0.2              | 0.3              | 1.5 | 4.2  | 0.6 | 0.2878            | 0.2437 |
|                        |        | Ox                | 0.6  | 1.5  | 0.4  | 0.1             | 0.4             | 0.1              | 0.3              | 1.5 | 3.4  | 0.5 | 0.2878            | 0.2437 |
|                        |        | Ox <sub>alt</sub> | 3.0  | 2.5  | 4.3  | 1.4             | 4.2             | 0.7              | 2.0              | 4.3 | 18.1 | 2.6 | 0.2879            | 0.2439 |
|                        | Y2W0   | Red               | 1.8  | 1.5  | 1.8  | 2.7             | 0.9             |                  |                  | 2.7 | 8.7  | 1.7 | 0.2881            | 0.2439 |
|                        |        | MV                | 0.7  | 1.3  | 0.4  | 1.2             | 0.9             |                  |                  | 1.3 | 4.5  | 0.9 | 0.2879            | 0.2438 |
|                        |        | Ox                | 0.8  | 1.3  | 0.6  | 1.1             | 0.6             |                  |                  | 1.3 | 4.4  | 0.9 | 0.2879            | 0.2438 |
|                        | His137 | Red               | 0.3  | 2.7  | 1.4  | 2.5             | 1.4             |                  |                  | 2.7 | 8.3  | 1.7 | 0.2831            | 0.2627 |
|                        |        | MV                | 1.5  | 2.7  | 0.8  | 1.9             | 2.6             |                  |                  | 2.7 | 9.5  | 1.9 | 0.2831            | 0.2627 |
|                        |        | Ox                | 0.4  | 2.3  | 0.7  | 1.5             | 2.6             |                  |                  | 2.6 | 7.5  | 1.5 | 0.2832            | 0.2627 |
|                        | C1W0   | Red               | 0.2  | 1.7  | 0.3  | 0.9             |                 |                  |                  | 1.7 | 3.1  | 0.8 | 0.2824            | 0.2627 |
|                        |        | Ox                | 0.3  | 1.6  | 0.4  | 1.2             |                 |                  |                  | 1.6 | 3.5  | 0.9 | 0.2823            | 0.2626 |
|                        | C1W1   | Red               | 0.3  | 1.7  | 0.2  | 0.7             |                 | 0.6              |                  | 1.7 | 3.5  | 0.7 | 0.2827            | 0.2626 |
|                        |        | Ox                | 0.3  | 1.5  | 0.3  | 0.7             |                 | 0.5              |                  | 1.5 | 3.3  | 0.7 | 0.2822            | 0.2626 |
| 2                      | C2W2   | Red               | 1.3  | 1.5  | 1.4  | 2.0             | 2.8             |                  |                  | 2.8 | 9.0  | 1.8 | 0.2832            | 0.2626 |
|                        |        | MV                | 1.3  | 1.5  | 1.6  | 2.1             | 2.9             |                  |                  | 2.9 | 9.4  | 1.9 | 0.2832            | 0.2626 |
|                        |        | Ox                | 1.3  | 1.5  | 1.6  | 2.1             | 2.9             |                  |                  | 2.9 | 9.4  | 1.9 | 0.2832            | 0.2626 |
|                        | Y2W2   | Red               | 1.7  | 0.3  | 1.6  | 0.7             | 0.5             | 0.8              | 2.2              | 2.2 | 7.8  | 1.1 | 0.2832            | 0.2626 |
|                        |        | MV                | 1.2  | 0.7  | 1.3  | 1.6             | 0.4             | 0.5              | 1.9              | 1.9 | 7.6  | 1.1 | 0.2822            | 0.2626 |
|                        |        | Ox                | 1.2  | 0.6  | 1.5  | 1.5             | 0.3             | 0.5              | 2.1              | 2.1 | 7.7  | 1.1 | 0.2823            | 0.2626 |
|                        | Y2W0   | Red               | 1.7  | 0.4  | 0.8  | 2.5             | 0.4             |                  |                  | 2.5 | 5.8  | 1.2 | 0.2823            | 0.2625 |
|                        |        | MV                | 1.2  | 0.6  | 0.6  | 2.7             | 0.8             |                  |                  | 2.7 | 5.9  | 1.2 | 0.2823            | 0.2625 |
|                        |        | Ox                | 1.4  | 0.7  | 0.7  | 2.8             | 1.0             |                  |                  | 2.8 | 6.6  | 1.3 | 0.2823            | 0.2625 |
|                        | C1W0   | Red               | 1.1  | 0.5  | 0.4  | 0.7             |                 |                  |                  | 1.1 | 2.7  | 0.7 | 0.2823            | 0.2625 |
|                        |        | Ox                | 1.7  | 0.5  | 0.4  | 0.3             |                 |                  |                  | 1.7 | 2.9  | 0.7 | 0.2823            | 0.2625 |
|                        | C1W1   | Ox                | 1.1  | 0.4  | 1.1  | 0.4             |                 | 2.4              |                  | 2.4 | 5.4  | 1.1 | 0.2822            | 0.2625 |
| 3                      | C2W2   | Red               | 0.3  | 2.0  | 1.4  | 0.1             | 1.9             |                  |                  | 2.0 | 5.7  | 1.1 | 0.2830            | 0.2627 |
|                        |        | MV                | 0.5  | 1.9  | 1.5  | 0.5             | 2.6             |                  |                  | 2.6 | 7.0  | 1.4 | 0.2830            | 0.2627 |
|                        |        | Ox                | 0.5  | 1.8  | 1.6  | 0.5             | 2.8             |                  |                  | 2.8 | 7.2  | 1.4 | 0.2830            | 0.2627 |
|                        | Y2W2   | Red               | 0.3  | 1.5  | 0.0  | 0.1             | 1.4             | 0.2              | 3.0              | 3.0 | 6.5  | 0.9 | 0.2828            | 0.2627 |
|                        |        | MV                | 0.3  | 1.5  | 0.2  | 0.9             | 1.6             | 0.0              | 3.2              | 3.2 | 7.7  | 1.1 | 0.2821            | 0.2627 |
|                        |        | Ox                | 0.5  | 1.5  | 0.2  | 0.9             | 1.6             | 0.0              | 2.9              | 2.9 | 7.6  | 1.1 | 0.2821            | 0.2627 |
|                        | Y2W0   | Red               | 0.3  | 1.5  | 0.3  | 1.0             | 1.8             |                  |                  | 1.8 | 4.9  | 1.0 | 0.2827            | 0.2627 |
|                        |        | MV                | 0.2  | 1.5  | 0.4  | 0.9             | 2.1             |                  |                  | 2.1 | 5.1  | 1.0 | 0.2819            | 0.2627 |
|                        |        | Ox                | 0.2  | 1.6  | 0.5  | 0.9             | 2.2             |                  |                  | 2.2 | 5.4  | 1.1 | 0.2819            | 0.2627 |
|                        | C1W0   | Red               | 0.1  | 1.5  | 0.3  | 1.0             |                 |                  |                  | 1.5 | 2.9  | 0.7 | 0.2822            | 0.2626 |
|                        |        | Ox                | 0.4  | 1.6  | 0.0  | 1.3             |                 |                  |                  | 1.6 | 3.3  | 0.8 | 0.2829            | 0.2627 |
|                        | C1W1   | Ox                | 0.4  | 1.6  | 0.0  | 2.0             |                 | 1.6              |                  | 2.0 | 5.6  | 1.1 | 0.2829            | 0.2627 |
| 3RFR crystal structure |        |                   |      |      |      |                 |                 |                  |                  |     |      |     |                   |        |
| 1                      | C2W2   | Red               | 0.0  | 0.1  | 0.1  | 0.6             | 2.7             |                  |                  | 2.7 | 3.5  | 0.7 | 0.2763            | 0.2483 |
|                        |        | MV                | 0.0  | 0.0  | 0.3  | 0.5             | 1.6             |                  |                  | 1.6 | 2.4  | 0.5 | 0.2763            | 0.2483 |
|                        |        | Ox                | 0.0  | 0.4  | 0.4  | 0.6             | 1.9             |                  |                  | 1.9 | 3.3  | 0.7 | 0.2763            | 0.2483 |
|                        | C1W0   | Red               | 0.4  | 0.0  | 0.1  | 1.4             |                 |                  |                  | 1.4 | 1.9  | 0.5 | 0.2765            | 0.2483 |
|                        |        | Ox                | 0.1  | 0.0  | 0.1  | 1.3             |                 |                  |                  | 1.3 | 1.5  | 0.4 | 0.2765            | 0.2483 |
|                        | C1W1   | Red               | 0.6  | 0.0  | 0.1  | 1.3             |                 | 2.6              |                  | 2.6 | 4.6  | 0.9 | 0.2767            | 0.2484 |
|                        |        | Ox                | 0.0  | 0.0  | 0.1  | 0.9             |                 | 2.3              |                  | 2.3 | 3.3  | 0.7 | 0.2764            | 0.2483 |
| 2                      | C1W0   | Red               | 0.2  | 0.0  | 0.4  | 0.1             |                 |                  |                  | 0.4 | 0.7  | 0.2 | 0.2765            | 0.2485 |
|                        |        | Ox                | 0.4  | 0.1  | 0.4  | 0.2             |                 |                  |                  | 0.4 | 1.1  | 0.3 | 0.2765            | 0.2485 |
|                        | C1W1   | Ox                | 0.3  | 0.1  | 0.4  | 0.5             |                 | 1.3              |                  | 1.3 | 2.6  | 0.5 | 0.2764            | 0.2484 |
| 3                      | C1W0   | Red               | 0.0  | 0.3  | 0.2  | 0.9             |                 |                  |                  | 0.9 | 1.4  | 0.4 | 0.2762            | 0.2484 |
|                        |        | Ox                | 0.0  | 0.3  | 0.2  | 0.9             |                 |                  |                  | 0.9 | 1.4  | 0.4 | 0.2762            | 0.2484 |
|                        | C1W1   | Ox                | 0.0  | 0.2  | 0.2  | 1.0             |                 | 0.5              |                  | 1.0 | 1.9  | 0.4 | 0.2760            | 0.2483 |

**Table S3.** Energy components of the various reactant states in the reaction with methanol. Five energies are given for each reactant in both the triplet ( $S = 1$ ) and singlet state ( $S = 0$ ): TPSS-D3/def2-SV(P) optimised geometries, TPSS-D3/def2-TZVPD and B3LYP-D3/def2-TZVPD single point energies, obtained in a COSMO continuum solvent with a dielectric constant of 4, zero-point energies (ZPE) from TPSS-D3/def2-SV(P) frequencies and the total energies, which are the sum of the ZPE and the B3LYP-D3/def2-TZVPD energies. The reference energy is always the triplet RS state.

| Energy | QM         |        | QM+COSMO   |        | QM+COSMO   |        | ZPE        |       | Total      |        |
|--------|------------|--------|------------|--------|------------|--------|------------|-------|------------|--------|
| Method | TPSS-D3    |        | TPSS-D3    |        | B3LYP-D3   |        | TPSS-D3    |       | B3LYP-D3   |        |
| Basis  | def2-SV(P) |        | def2-TZVPD |        | def2-TZVPD |        | def2-SV(P) |       | def2-TZVPD |        |
| $S$    | 1          | 0      | 1          | 0      | 1          | 0      | 1          | 0     | 1          | 0      |
| RS     | 0.0        | 19.4   | 0.0        | 33.0   | 0.0        | 85.2   | 0.0        | -0.3  | 0.0        | 84.8   |
| R      | -21.0      | -2.5   | -11.7      | 24.6   | -1.2       | 74.2   | 2.9        | 2.9   | 1.7        | 77.1   |
| TS1    | 24.0       | 28.1   | 20.7       | 61.1   | 35.1       | 124.4  | -13.2      | -12.6 | 21.9       | 111.8  |
| Im1    | 6.9        | 6.8    | -10.0      | 74.2   | -8.8       | 141.2  | -6.8       | -7.0  | -15.6      | 134.2  |
| Im2    | -20.1      | -87.0  | -32.2      | -100.0 | -8.1       | -60.8  | 1.9        | 9.0   | -6.2       | -51.8  |
| TS2    | 125.6      | -30.9  | 113.2      | -34.7  | 132.4      | -5.5   | -8.3       | 6.2   | 124.2      | 0.7    |
| P      | -32.9      | -237.1 | -16.5      | -226.9 | 9.0        | -233.6 | 13.7       | 16.9  | 22.6       | -216.7 |

**Figure S1.** QM-refined structures of site A in the first protomer of the 3RGB structure, modelled by two Cu ions in the (a) fully reduced and (b) fully oxidised states.

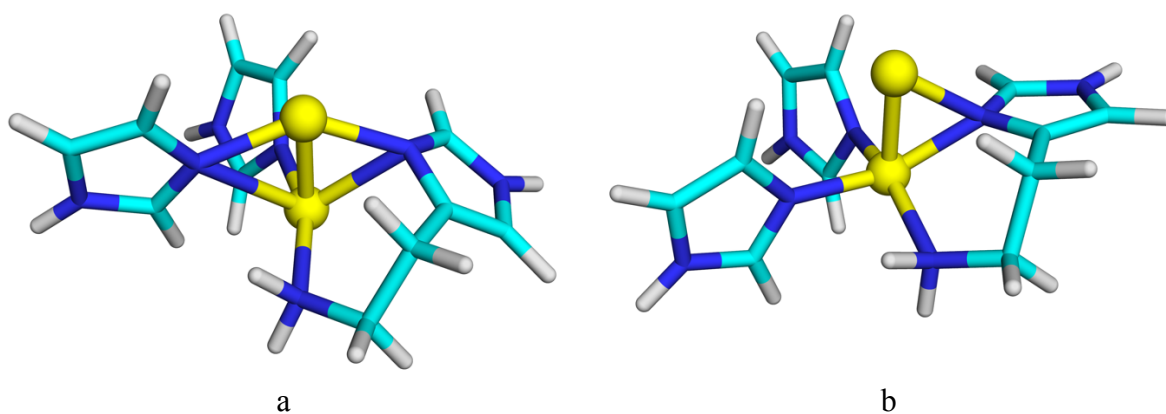

**Figure S2.** (a) The Yoshizawa-type structure of pMMO (first protomer of the 3RGB structure, Y2W0a) obtained by QM/MM (i.e. QM-refinement with  $w_A = 0$ ) for the reduced state. (b) A quantum-refined structure with two extra water molecules for the MV state (Y2W2). (c) The quantum-refined structure of site A with the backbone carbonyl group coordinating to  $\text{Cu}_B$  (reduced state).

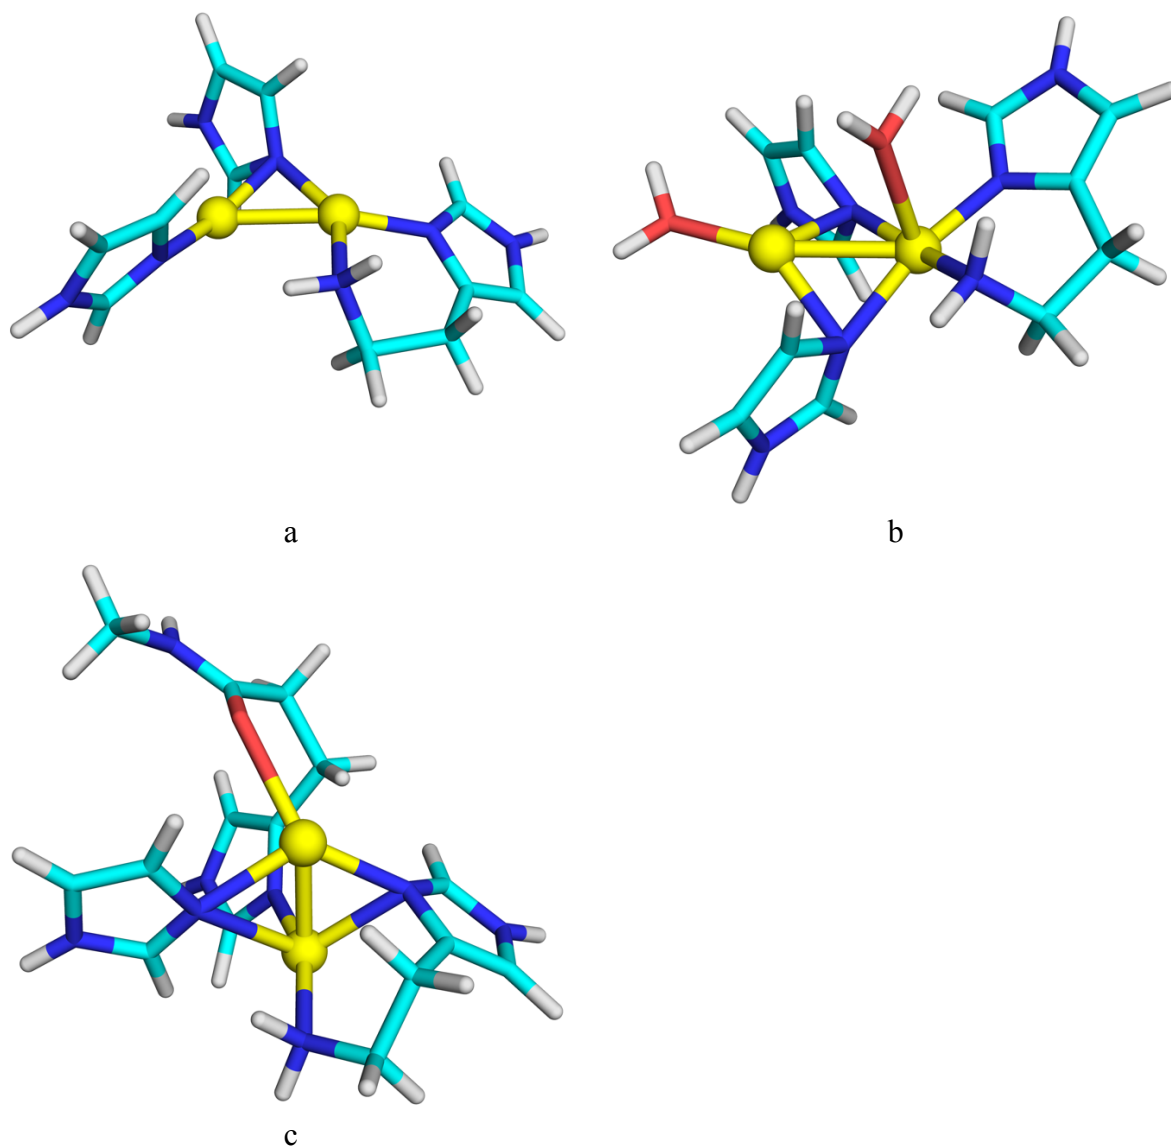

**Figure S3.** QM-refined structures of site A, modelled with a single Cu ion (C1W0) in the (a) reduced and (b) oxidised states.

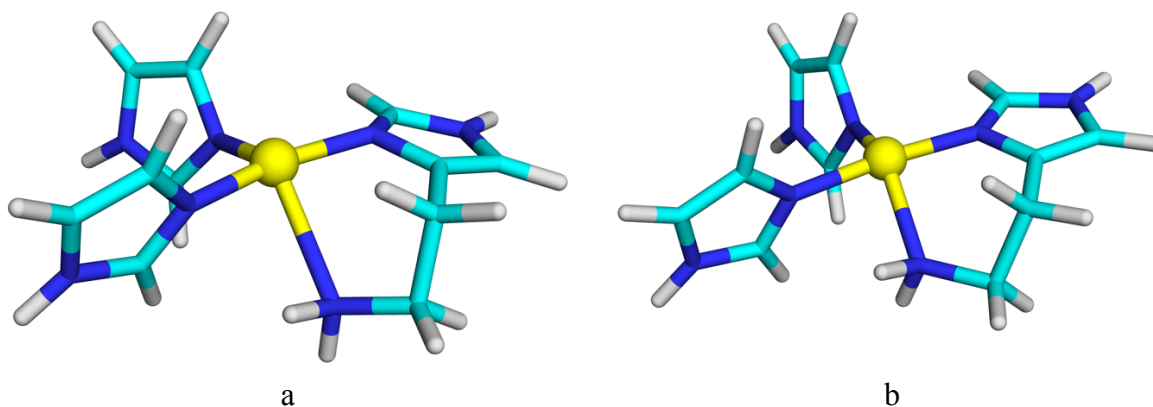

**Figure S4.** QM-refined structures of site A, modelled with a single Cu ion and the water molecule in the (a) oxidised state (C1W1). Part (b) shows the electron-density maps of the oxidised state. The  $2mF_o - DF_c$  maps are contoured at  $1.0 \sigma$  and the  $mF_o - DF_c$  maps are contoured at  $+3.0 \sigma$  (green) and  $-3.0 \sigma$  (red).

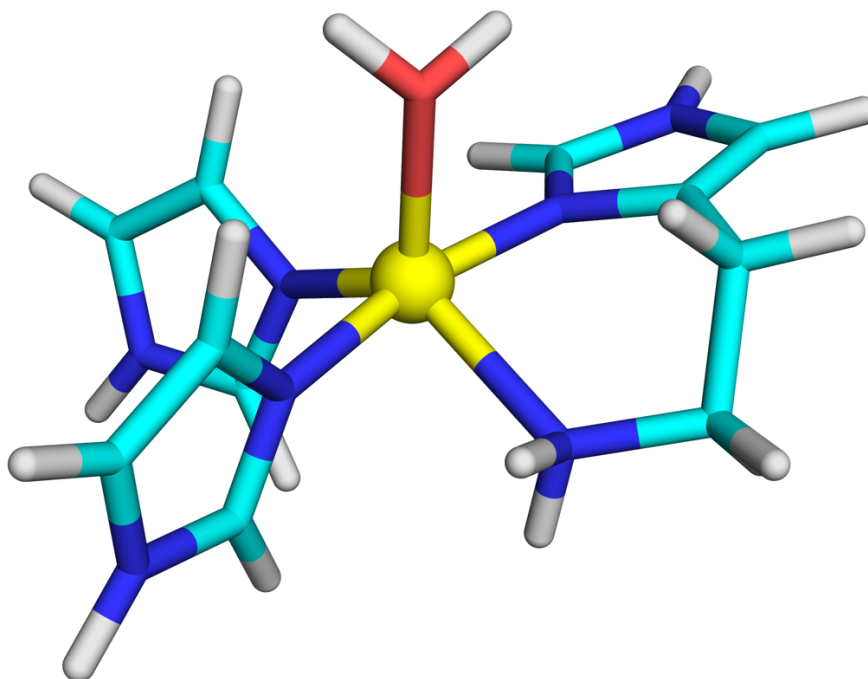

**Figure S5.** QM-refined structures of site A in the second protomer of the 3RGB structure, modelled (a) with a two Cu ions (C2W0) in the reduced state, (b) the Yoshizawa-type structure (Y2W2) or (c) with a single Cu ion (still in the reduced state).

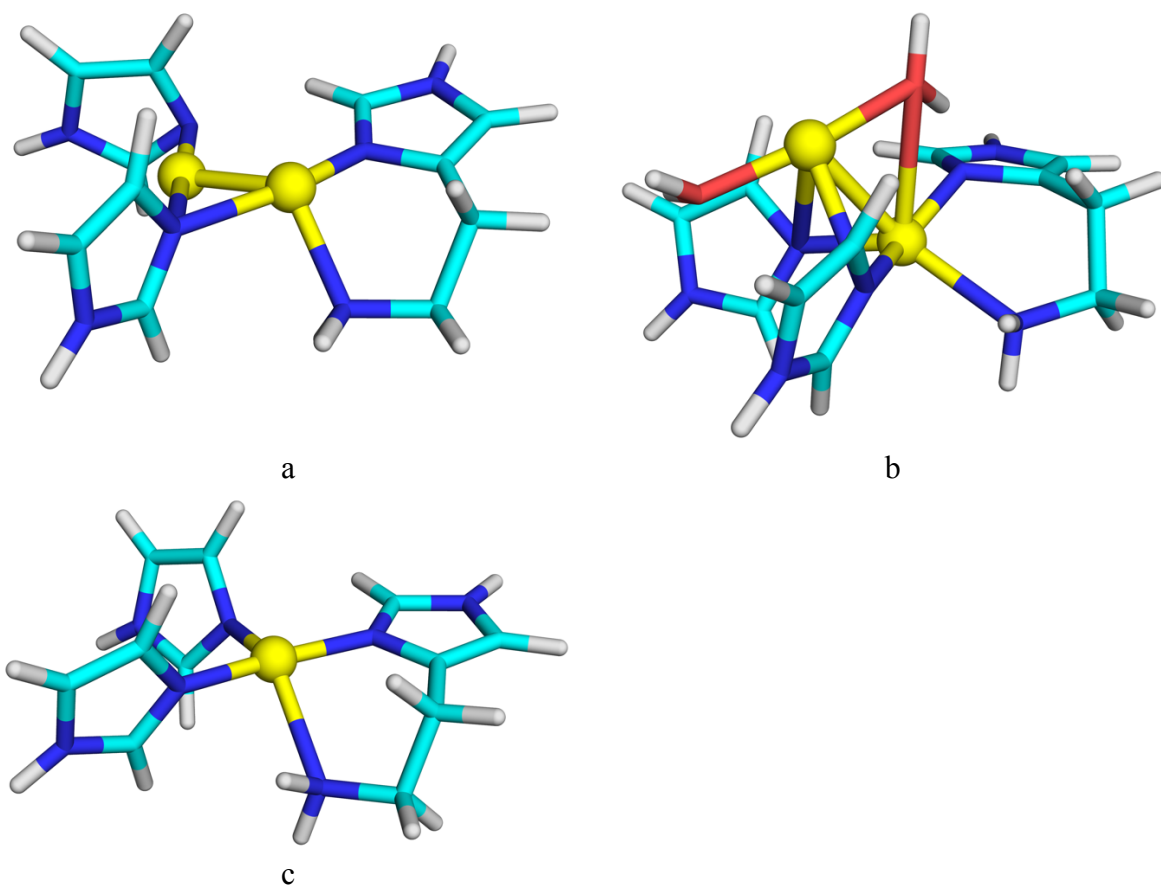

**Table S4.** Coordinates of the QM system for the mononuclear site in all optimised structures.

REMARK PDB files of the mononuclear copper site in pMMO obtained by quantum refinement  
REMARK L. Cao, O. Caldararu, A. C. Rosenzweig, U. Ryde  
REMARK Quantum refinement does not support dinuclear copper sites in crystal structures  
REMARK of particulate methane monooxygenase  
REMARK Angew. Chemie 2017  
REMARK Supplementary material  
REMARK 18 structures are given:  
REMARK 2 Crystal structures: 3RGB or 3RFR  
REMARK 3 subunits  
REMARK Reduced, Cu(I), oxidised, Cu(II), or oxidised state with an extra water molecule  
REMARK Only heavy atoms in the QM system are included; other atoms are not moved

REMARK

REMARK 3RGB, Subunit 1, Reduced state

REMARK DATE:04-Nov-2016 15:59:39 created by user: lili

REMARK CNS VERSION:1.3

|      |    |      |     |     |        |         |        |      |       |   |    |   |
|------|----|------|-----|-----|--------|---------|--------|------|-------|---|----|---|
| ATOM | 1  | CB   | HIS | 33  | 39.558 | 130.222 | 81.449 | 1.00 | 73.31 | A | C  | 0 |
| ATOM | 2  | CG   | HIS | 33  | 39.536 | 130.282 | 82.943 | 1.00 | 72.87 | A | C  | 0 |
| ATOM | 3  | CD2  | HIS | 33  | 40.433 | 130.882 | 83.811 | 1.00 | 72.68 | A | C  | 0 |
| ATOM | 4  | ND1  | HIS | 33  | 38.383 | 129.977 | 83.651 | 1.00 | 72.38 | A | N  | 0 |
| ATOM | 5  | CE1  | HIS | 33  | 38.558 | 130.382 | 84.908 | 1.00 | 72.38 | A | C  | 0 |
| ATOM | 6  | NE2  | HIS | 33  | 39.798 | 130.929 | 85.043 | 1.00 | 72.37 | A | N  | 0 |
| ATOM | 7  | C    | HIS | 33  | 39.582 | 131.594 | 79.449 | 1.00 | 73.42 | A | C  | 0 |
| ATOM | 8  | N    | HIS | 33  | 37.660 | 131.761 | 81.212 | 1.00 | 73.34 | A | N  | 0 |
| ATOM | 9  | CA   | HIS | 33  | 39.101 | 131.627 | 80.915 | 1.00 | 73.37 | A | C  | 0 |
| ATOM | 10 | CB   | HIS | 137 | 35.988 | 128.077 | 85.420 | 1.00 | 43.65 | A | C  | 0 |
| ATOM | 11 | CG   | HIS | 137 | 35.055 | 129.223 | 85.194 | 1.00 | 43.97 | A | C  | 0 |
| ATOM | 12 | CD2  | HIS | 137 | 33.793 | 129.437 | 85.714 | 1.00 | 43.67 | A | C  | 0 |
| ATOM | 13 | ND1  | HIS | 137 | 35.445 | 130.309 | 84.427 | 1.00 | 44.90 | A | N  | 0 |
| ATOM | 14 | CE1  | HIS | 137 | 34.440 | 131.182 | 84.497 | 1.00 | 44.62 | A | C  | 0 |
| ATOM | 15 | NE2  | HIS | 137 | 33.425 | 130.694 | 85.267 | 1.00 | 43.95 | A | N  | 0 |
| ATOM | 16 | CB   | HIS | 139 | 33.507 | 127.696 | 78.902 | 1.00 | 49.60 | A | C  | 0 |
| ATOM | 17 | CG   | HIS | 139 | 34.226 | 128.599 | 79.774 | 1.00 | 50.45 | A | C  | 0 |
| ATOM | 18 | CD2  | HIS | 139 | 35.368 | 128.398 | 80.520 | 1.00 | 51.09 | A | C  | 0 |
| ATOM | 19 | ND1  | HIS | 139 | 33.792 | 129.883 | 80.036 | 1.00 | 50.61 | A | N  | 0 |
| ATOM | 20 | CE1  | HIS | 139 | 34.668 | 130.428 | 80.938 | 1.00 | 51.73 | A | C  | 0 |
| ATOM | 21 | NE2  | HIS | 139 | 35.625 | 129.541 | 81.267 | 1.00 | 51.75 | A | N  | 0 |
| ATOM | 22 | CU+1 | CU1 | 416 | 36.806 | 129.802 | 82.728 | 1.00 | 64.05 | A | CU | 1 |

END

REMARK 3RGB, Subunit 1, Oxidised state

REMARK DATE:04-Nov-2016 15:59:39 created by user: lili

REMARK CNS VERSION:1.3

|      |    |      |     |     |        |         |        |      |       |   |    |   |
|------|----|------|-----|-----|--------|---------|--------|------|-------|---|----|---|
| ATOM | 1  | CB   | HIS | 33  | 39.911 | 130.476 | 81.572 | 1.00 | 74.85 | A | C  | 0 |
| ATOM | 2  | CG   | HIS | 33  | 39.672 | 130.484 | 83.055 | 1.00 | 74.33 | A | C  | 0 |
| ATOM | 3  | CD2  | HIS | 33  | 40.522 | 130.877 | 84.072 | 1.00 | 74.26 | A | C  | 0 |
| ATOM | 4  | ND1  | HIS | 33  | 38.438 | 130.187 | 83.638 | 1.00 | 73.84 | A | N  | 0 |
| ATOM | 5  | CE1  | HIS | 33  | 38.532 | 130.410 | 84.955 | 1.00 | 73.92 | A | C  | 0 |
| ATOM | 6  | NE2  | HIS | 33  | 39.789 | 130.817 | 85.246 | 1.00 | 74.06 | A | N  | 0 |
| ATOM | 7  | C    | HIS | 33  | 39.578 | 131.593 | 79.450 | 1.00 | 75.04 | A | C  | 0 |
| ATOM | 8  | N    | HIS | 33  | 37.650 | 131.186 | 81.051 | 1.00 | 75.22 | A | N  | 0 |
| ATOM | 9  | CA   | HIS | 33  | 39.071 | 131.617 | 80.906 | 1.00 | 75.00 | A | C  | 0 |
| ATOM | 10 | CB   | HIS | 137 | 36.012 | 128.058 | 85.421 | 1.00 | 43.37 | A | C  | 0 |
| ATOM | 11 | CG   | HIS | 137 | 35.116 | 129.201 | 85.158 | 1.00 | 43.47 | A | C  | 0 |
| ATOM | 12 | CD2  | HIS | 137 | 33.902 | 129.524 | 85.725 | 1.00 | 42.88 | A | C  | 0 |
| ATOM | 13 | ND1  | HIS | 137 | 35.514 | 130.203 | 84.285 | 1.00 | 44.35 | A | N  | 0 |
| ATOM | 14 | CE1  | HIS | 137 | 34.554 | 131.143 | 84.346 | 1.00 | 44.08 | A | C  | 0 |
| ATOM | 15 | NE2  | HIS | 137 | 33.575 | 130.760 | 85.205 | 1.00 | 43.00 | A | N  | 0 |
| ATOM | 16 | CB   | HIS | 139 | 33.513 | 127.691 | 78.906 | 1.00 | 47.68 | A | C  | 0 |
| ATOM | 17 | CG   | HIS | 139 | 34.225 | 128.591 | 79.782 | 1.00 | 48.49 | A | C  | 0 |
| ATOM | 18 | CD2  | HIS | 139 | 35.316 | 128.377 | 80.597 | 1.00 | 49.04 | A | C  | 0 |
| ATOM | 19 | ND1  | HIS | 139 | 33.795 | 129.881 | 80.000 | 1.00 | 48.66 | A | N  | 0 |
| ATOM | 20 | CE1  | HIS | 139 | 34.602 | 130.431 | 80.945 | 1.00 | 49.68 | A | C  | 0 |
| ATOM | 21 | NE2  | HIS | 139 | 35.525 | 129.530 | 81.346 | 1.00 | 49.68 | A | N  | 0 |
| ATOM | 22 | CU+1 | CU1 | 416 | 36.881 | 129.891 | 82.686 | 1.00 | 64.20 | A | CU | 1 |

END

REMARK 3RGB, Subunit 1, Oxidised state with an extra water molecule

REMARK DATE:08-Nov-2016 15:55:59 created by user: lili

REMARK CNS VERSION:1.3

|      |   |     |     |      |        |         |        |      |       |   |   |   |
|------|---|-----|-----|------|--------|---------|--------|------|-------|---|---|---|
| ATOM | 1 | CB  | HIS | A 33 | 39.883 | 130.479 | 81.582 | 1.00 | 71.86 | A | C | 0 |
| ATOM | 2 | CG  | HIS | A 33 | 39.690 | 130.528 | 83.075 | 1.00 | 71.34 | A | C | 0 |
| ATOM | 3 | CD2 | HIS | A 33 | 40.598 | 130.819 | 84.076 | 1.00 | 71.43 | A | C | 0 |
| ATOM | 4 | ND1 | HIS | A 33 | 38.442 | 130.380 | 83.686 | 1.00 | 70.70 | A | N | 0 |
| ATOM | 5 | CE1 | HIS | A 33 | 38.584 | 130.569 | 84.998 | 1.00 | 70.88 | A | C | 0 |
| ATOM | 6 | NE2 | HIS | A 33 | 39.886 | 130.832 | 85.265 | 1.00 | 71.25 | A | N | 0 |
| ATOM | 7 | C   | HIS | A 33 | 39.579 | 131.595 | 79.450 | 1.00 | 72.08 | A | C | 0 |
| ATOM | 8 | N   | HIS | A 33 | 37.642 | 131.281 | 81.056 | 1.00 | 72.17 | A | N | 0 |
| ATOM | 9 | CA  | HIS | A 33 | 39.079 | 131.634 | 80.904 | 1.00 | 72.04 | A | C | 0 |

|      |    |      |     |   |     |        |         |        |      |       |   |    |   |
|------|----|------|-----|---|-----|--------|---------|--------|------|-------|---|----|---|
| ATOM | 10 | CB   | HIS | A | 137 | 36.006 | 128.065 | 85.426 | 1.00 | 42.08 | A | C  | 0 |
| ATOM | 11 | CG   | HIS | A | 137 | 35.102 | 129.208 | 85.170 | 1.00 | 42.46 | A | C  | 0 |
| ATOM | 12 | CD2  | HIS | A | 137 | 33.873 | 129.505 | 85.718 | 1.00 | 41.85 | A | C  | 0 |
| ATOM | 13 | ND1  | HIS | A | 137 | 35.503 | 130.233 | 84.327 | 1.00 | 43.52 | A | N  | 0 |
| ATOM | 14 | CE1  | HIS | A | 137 | 34.532 | 131.157 | 84.383 | 1.00 | 43.48 | A | C  | 0 |
| ATOM | 15 | NE2  | HIS | A | 137 | 33.541 | 130.746 | 85.214 | 1.00 | 42.16 | A | N  | 0 |
| ATOM | 16 | CB   | HIS | A | 139 | 33.514 | 127.692 | 78.904 | 1.00 | 46.16 | A | C  | 0 |
| ATOM | 17 | CG   | HIS | A | 139 | 34.206 | 128.617 | 79.773 | 1.00 | 47.19 | A | C  | 0 |
| ATOM | 18 | CD2  | HIS | A | 139 | 35.312 | 128.435 | 80.569 | 1.00 | 47.74 | A | C  | 0 |
| ATOM | 19 | ND1  | HIS | A | 139 | 33.747 | 129.896 | 80.001 | 1.00 | 47.61 | A | N  | 0 |
| ATOM | 20 | CE1  | HIS | A | 139 | 34.555 | 130.464 | 80.937 | 1.00 | 48.85 | A | C  | 0 |
| ATOM | 21 | NE2  | HIS | A | 139 | 35.502 | 129.588 | 81.320 | 1.00 | 48.45 | A | N  | 0 |
| ATOM | 22 | O    | HOH | A | 416 | 37.843 | 127.924 | 82.467 | 1.00 | 52.69 | A | O  | 0 |
| ATOM | 23 | CU+1 | CU1 | A | 417 | 36.893 | 129.893 | 82.710 | 1.00 | 66.97 | A | CU | 1 |

END

REMARK 3RGB, Subunit 2, Reduced state

REMARK DATE:11-Apr-2017 12:41:20 created by user: lili

REMARK CNS VERSION:1.3

|      |    |      |     |   |     |        |         |        |      |       |   |    |   |
|------|----|------|-----|---|-----|--------|---------|--------|------|-------|---|----|---|
| ATOM | 1  | CB   | HIS | E | 33  | 35.739 | 157.866 | 32.437 | 1.00 | 62.03 | E | C  | 0 |
| ATOM | 2  | CG   | HIS | E | 33  | 35.413 | 159.178 | 31.782 | 1.00 | 62.12 | E | C  | 0 |
| ATOM | 3  | CD2  | HIS | E | 33  | 36.188 | 160.006 | 30.997 | 1.00 | 62.91 | E | C  | 0 |
| ATOM | 4  | ND1  | HIS | E | 33  | 34.150 | 159.748 | 31.878 | 1.00 | 61.28 | E | N  | 0 |
| ATOM | 5  | CE1  | HIS | E | 33  | 34.133 | 160.860 | 31.154 | 1.00 | 61.46 | E | C  | 0 |
| ATOM | 6  | NE2  | HIS | E | 33  | 35.362 | 161.058 | 30.613 | 1.00 | 63.11 | E | N  | 0 |
| ATOM | 7  | C    | HIS | E | 33  | 35.696 | 155.460 | 32.461 | 1.00 | 61.00 | E | C  | 0 |
| ATOM | 8  | N    | HIS | E | 33  | 33.609 | 156.748 | 32.014 | 1.00 | 62.27 | E | N  | 0 |
| ATOM | 9  | CA   | HIS | E | 33  | 35.054 | 156.648 | 31.755 | 1.00 | 61.93 | E | C  | 0 |
| ATOM | 10 | CB   | HIS | E | 137 | 31.830 | 162.236 | 33.284 | 1.00 | 41.72 | E | C  | 0 |
| ATOM | 11 | CG   | HIS | E | 137 | 30.823 | 161.393 | 32.545 | 1.00 | 41.82 | E | C  | 0 |
| ATOM | 12 | CD2  | HIS | E | 137 | 29.476 | 161.607 | 32.358 | 1.00 | 41.88 | E | C  | 0 |
| ATOM | 13 | ND1  | HIS | E | 137 | 31.184 | 160.218 | 31.909 | 1.00 | 42.05 | E | N  | 0 |
| ATOM | 14 | CE1  | HIS | E | 137 | 30.077 | 159.703 | 31.394 | 1.00 | 41.53 | E | C  | 0 |
| ATOM | 15 | NE2  | HIS | E | 137 | 29.020 | 160.518 | 31.646 | 1.00 | 41.95 | E | N  | 0 |
| ATOM | 16 | CB   | HIS | E | 139 | 30.178 | 156.685 | 37.123 | 1.00 | 45.17 | E | C  | 0 |
| ATOM | 17 | CG   | HIS | E | 139 | 30.622 | 157.008 | 35.779 | 1.00 | 44.56 | E | C  | 0 |
| ATOM | 18 | CD2  | HIS | E | 139 | 31.601 | 157.862 | 35.329 | 1.00 | 45.27 | E | C  | 0 |
| ATOM | 19 | ND1  | HIS | E | 139 | 30.063 | 156.436 | 34.661 | 1.00 | 44.86 | E | N  | 0 |
| ATOM | 20 | CE1  | HIS | E | 139 | 30.674 | 156.975 | 33.565 | 1.00 | 45.65 | E | C  | 0 |
| ATOM | 21 | NE2  | HIS | E | 139 | 31.617 | 157.843 | 33.947 | 1.00 | 45.55 | E | N  | 0 |
| ATOM | 22 | CU+1 | CU1 | E | 416 | 32.678 | 158.940 | 32.726 | 1.00 | 59.68 | E | CU | 1 |

END

REMARK 3RGB, Subunit 2, Oxidised state

REMARK DATE:11-Apr-2017 12:41:20 created by user: lili

REMARK CNS VERSION:1.3

|      |    |      |     |   |     |        |         |        |      |       |   |    |   |
|------|----|------|-----|---|-----|--------|---------|--------|------|-------|---|----|---|
| ATOM | 1  | CB   | HIS | E | 33  | 35.959 | 157.841 | 32.100 | 1.00 | 59.51 | E | C  | 0 |
| ATOM | 2  | CG   | HIS | E | 33  | 35.457 | 159.187 | 31.618 | 1.00 | 59.86 | E | C  | 0 |
| ATOM | 3  | CD2  | HIS | E | 33  | 36.194 | 160.201 | 31.044 | 1.00 | 60.67 | E | C  | 0 |
| ATOM | 4  | ND1  | HIS | E | 33  | 34.138 | 159.651 | 31.698 | 1.00 | 59.11 | E | N  | 0 |
| ATOM | 5  | CE1  | HIS | E | 33  | 34.073 | 160.871 | 31.162 | 1.00 | 59.44 | E | C  | 0 |
| ATOM | 6  | NE2  | HIS | E | 33  | 35.308 | 161.233 | 30.767 | 1.00 | 60.99 | E | N  | 0 |
| ATOM | 7  | C    | HIS | E | 33  | 35.677 | 155.458 | 32.469 | 1.00 | 58.40 | E | C  | 0 |
| ATOM | 8  | N    | HIS | E | 33  | 33.763 | 156.952 | 32.592 | 1.00 | 59.37 | E | N  | 0 |
| ATOM | 9  | CA   | HIS | E | 33  | 34.999 | 156.659 | 31.802 | 1.00 | 59.12 | E | C  | 0 |
| ATOM | 10 | CB   | HIS | E | 137 | 31.850 | 162.244 | 33.294 | 1.00 | 40.56 | E | C  | 0 |
| ATOM | 11 | CG   | HIS | E | 137 | 30.875 | 161.388 | 32.559 | 1.00 | 40.50 | E | C  | 0 |
| ATOM | 12 | CD2  | HIS | E | 137 | 29.579 | 161.657 | 32.186 | 1.00 | 40.24 | E | C  | 0 |
| ATOM | 13 | ND1  | HIS | E | 137 | 31.205 | 160.120 | 32.112 | 1.00 | 40.70 | E | N  | 0 |
| ATOM | 14 | CE1  | HIS | E | 137 | 30.120 | 159.610 | 31.522 | 1.00 | 39.97 | E | C  | 0 |
| ATOM | 15 | NE2  | HIS | E | 137 | 29.126 | 160.521 | 31.555 | 1.00 | 40.28 | E | N  | 0 |
| ATOM | 16 | CB   | HIS | E | 139 | 30.183 | 156.693 | 37.124 | 1.00 | 42.83 | E | C  | 0 |
| ATOM | 17 | CG   | HIS | E | 139 | 30.610 | 157.015 | 35.777 | 1.00 | 42.30 | E | C  | 0 |
| ATOM | 18 | CD2  | HIS | E | 139 | 31.508 | 157.937 | 35.293 | 1.00 | 42.78 | E | C  | 0 |
| ATOM | 19 | ND1  | HIS | E | 139 | 30.095 | 156.358 | 34.689 | 1.00 | 42.57 | E | N  | 0 |
| ATOM | 20 | CE1  | HIS | E | 139 | 30.635 | 156.896 | 33.567 | 1.00 | 43.27 | E | C  | 0 |
| ATOM | 21 | NE2  | HIS | E | 139 | 31.505 | 157.859 | 33.911 | 1.00 | 43.06 | E | N  | 0 |
| ATOM | 22 | CU+1 | CU1 | E | 416 | 32.717 | 158.882 | 32.685 | 1.00 | 60.13 | E | CU | 1 |

END

REMARK 3RGB, Subunit 2, Oxidised state with an extra water molecule

REMARK DATE:28-Apr-2017 22:41:54 created by user: lili

REMARK CNS VERSION:1.3

|      |   |     |     |   |    |        |         |        |      |       |   |   |   |
|------|---|-----|-----|---|----|--------|---------|--------|------|-------|---|---|---|
| ATOM | 1 | CB  | HIS | E | 33 | 35.886 | 157.873 | 32.189 | 1.00 | 59.80 | E | C | 0 |
| ATOM | 2 | CG  | HIS | E | 33 | 35.398 | 159.200 | 31.646 | 1.00 | 60.12 | E | C | 0 |
| ATOM | 3 | CD2 | HIS | E | 33 | 36.154 | 160.227 | 31.120 | 1.00 | 61.04 | E | C | 0 |
| ATOM | 4 | ND1 | HIS | E | 33 | 34.064 | 159.621 | 31.606 | 1.00 | 59.31 | E | N | 0 |
| ATOM | 5 | CE1 | HIS | E | 33 | 34.010 | 160.833 | 31.058 | 1.00 | 59.75 | E | C | 0 |
| ATOM | 6 | NE2 | HIS | E | 33 | 35.265 | 161.230 | 30.758 | 1.00 | 61.48 | E | N | 0 |
| ATOM | 7 | C   | HIS | E | 33 | 35.679 | 155.459 | 32.468 | 1.00 | 58.72 | E | C | 0 |
| ATOM | 8 | N   | HIS | E | 33 | 33.688 | 156.900 | 32.464 | 1.00 | 59.81 | E | N | 0 |
| ATOM | 9 | CA  | HIS | E | 33 | 35.003 | 156.662 | 31.792 | 1.00 | 59.53 | E | C | 0 |

|      |    |      |     |   |     |        |         |        |      |       |   |    |   |
|------|----|------|-----|---|-----|--------|---------|--------|------|-------|---|----|---|
| ATOM | 10 | CB   | HIS | E | 137 | 31.848 | 162.241 | 33.292 | 1.00 | 39.65 | E | C  | 0 |
| ATOM | 11 | CG   | HIS | E | 137 | 30.869 | 161.386 | 32.558 | 1.00 | 39.95 | E | C  | 0 |
| ATOM | 12 | CD2  | HIS | E | 137 | 29.577 | 161.680 | 32.189 | 1.00 | 39.80 | E | C  | 0 |
| ATOM | 13 | ND1  | HIS | E | 137 | 31.171 | 160.110 | 32.113 | 1.00 | 40.08 | E | N  | 0 |
| ATOM | 14 | CE1  | HIS | E | 137 | 30.074 | 159.621 | 31.530 | 1.00 | 39.60 | E | C  | 0 |
| ATOM | 15 | NE2  | HIS | E | 137 | 29.098 | 160.551 | 31.562 | 1.00 | 40.03 | E | N  | 0 |
| ATOM | 16 | CB   | HIS | E | 139 | 30.186 | 156.696 | 37.125 | 1.00 | 41.73 | E | C  | 0 |
| ATOM | 17 | CG   | HIS | E | 139 | 30.582 | 157.002 | 35.765 | 1.00 | 40.91 | E | C  | 0 |
| ATOM | 18 | CD2  | HIS | E | 139 | 31.427 | 157.943 | 35.234 | 1.00 | 41.13 | E | C  | 0 |
| ATOM | 19 | ND1  | HIS | E | 139 | 30.090 | 156.276 | 34.711 | 1.00 | 41.47 | E | N  | 0 |
| ATOM | 20 | CE1  | HIS | E | 139 | 30.600 | 156.792 | 33.563 | 1.00 | 42.20 | E | C  | 0 |
| ATOM | 21 | NE2  | HIS | E | 139 | 31.427 | 157.802 | 33.856 | 1.00 | 41.45 | E | N  | 0 |
| ATOM | 22 | O    | HOH | E | 416 | 33.826 | 159.548 | 34.573 | 1.00 | 48.02 | E | O  | 0 |
| ATOM | 23 | CU+1 | CU1 | E | 417 | 32.656 | 158.842 | 32.632 | 1.00 | 62.64 | E | CU | 1 |

END

REMARK 3RGB, Subunit 3, Reduced state

REMARK DATE:26-Jun-2017 15:10:27 created by user: lili

REMARK CNS VERSION:1.3

|      |    |      |     |   |     |        |         |        |      |       |   |    |   |
|------|----|------|-----|---|-----|--------|---------|--------|------|-------|---|----|---|
| ATOM | 1  | CB   | HIS | I | 33  | 34.208 | 101.593 | 33.639 | 1.00 | 65.19 | I | C  | 0 |
| ATOM | 2  | CG   | HIS | I | 33  | 33.709 | 100.358 | 32.950 | 1.00 | 63.32 | I | C  | 0 |
| ATOM | 3  | CD2  | HIS | I | 33  | 34.393 | 99.184  | 32.704 | 1.00 | 62.66 | I | C  | 0 |
| ATOM | 4  | ND1  | HIS | I | 33  | 32.362 | 100.165 | 32.640 | 1.00 | 62.85 | I | N  | 0 |
| ATOM | 5  | CE1  | HIS | I | 33  | 32.236 | 98.899  | 32.241 | 1.00 | 61.69 | I | C  | 0 |
| ATOM | 6  | NE2  | HIS | I | 33  | 33.443 | 98.278  | 32.260 | 1.00 | 61.82 | I | N  | 0 |
| ATOM | 7  | C    | HIS | I | 33  | 34.334 | 102.858 | 35.741 | 1.00 | 67.59 | I | C  | 0 |
| ATOM | 8  | N    | HIS | I | 33  | 32.195 | 102.113 | 34.878 | 1.00 | 66.92 | I | N  | 0 |
| ATOM | 9  | CA   | HIS | I | 33  | 33.615 | 101.692 | 35.082 | 1.00 | 66.67 | I | C  | 0 |
| ATOM | 10 | CB   | HIS | I | 137 | 29.516 | 99.980  | 30.220 | 1.00 | 57.16 | I | C  | 0 |
| ATOM | 11 | CG   | HIS | I | 137 | 28.741 | 99.823  | 31.519 | 1.00 | 56.37 | I | C  | 0 |
| ATOM | 12 | CD2  | HIS | I | 137 | 27.384 | 99.728  | 31.741 | 1.00 | 56.56 | I | C  | 0 |
| ATOM | 13 | ND1  | HIS | I | 137 | 29.413 | 99.669  | 32.729 | 1.00 | 55.16 | I | N  | 0 |
| ATOM | 14 | CE1  | HIS | I | 137 | 28.481 | 99.502  | 33.657 | 1.00 | 55.62 | I | C  | 0 |
| ATOM | 15 | NE2  | HIS | I | 137 | 27.235 | 99.536  | 33.102 | 1.00 | 55.52 | I | N  | 0 |
| ATOM | 16 | CB   | HIS | I | 139 | 28.174 | 106.072 | 33.340 | 1.00 | 48.56 | I | C  | 0 |
| ATOM | 17 | CG   | HIS | I | 139 | 28.627 | 104.733 | 33.712 | 1.00 | 48.95 | I | C  | 0 |
| ATOM | 18 | CD2  | HIS | I | 139 | 29.466 | 103.864 | 33.053 | 1.00 | 49.86 | I | C  | 0 |
| ATOM | 19 | ND1  | HIS | I | 139 | 28.257 | 104.090 | 34.875 | 1.00 | 49.19 | I | N  | 0 |
| ATOM | 20 | CE1  | HIS | I | 139 | 28.859 | 102.855 | 34.888 | 1.00 | 49.72 | I | C  | 0 |
| ATOM | 21 | NE2  | HIS | I | 139 | 29.588 | 102.693 | 33.784 | 1.00 | 49.20 | I | N  | 0 |
| ATOM | 22 | CU+1 | CU1 | I | 417 | 30.789 | 101.270 | 33.302 | 1.00 | 71.43 | I | CU | 1 |

END

REMARK 3RGB, Subunit 3, Oxidised state

REMARK DATE:26-Jun-2017 15:10:27 created by user: lili

REMARK CNS VERSION:1.3

|      |    |      |     |   |     |        |         |        |      |       |   |    |   |
|------|----|------|-----|---|-----|--------|---------|--------|------|-------|---|----|---|
| ATOM | 1  | CB   | HIS | I | 33  | 34.380 | 101.309 | 33.784 | 1.00 | 63.58 | I | C  | 0 |
| ATOM | 2  | CG   | HIS | I | 33  | 33.727 | 100.174 | 33.039 | 1.00 | 61.90 | I | C  | 0 |
| ATOM | 3  | CD2  | HIS | I | 33  | 34.320 | 99.009  | 32.604 | 1.00 | 61.51 | I | C  | 0 |
| ATOM | 4  | ND1  | HIS | I | 33  | 32.350 | 100.069 | 32.782 | 1.00 | 61.73 | I | N  | 0 |
| ATOM | 5  | CE1  | HIS | I | 33  | 32.130 | 98.862  | 32.244 | 1.00 | 60.88 | I | C  | 0 |
| ATOM | 6  | NE2  | HIS | I | 33  | 33.303 | 98.208  | 32.119 | 1.00 | 61.20 | I | N  | 0 |
| ATOM | 7  | C    | HIS | I | 33  | 34.319 | 102.861 | 35.740 | 1.00 | 65.57 | I | C  | 0 |
| ATOM | 8  | N    | HIS | I | 33  | 32.308 | 102.351 | 34.484 | 1.00 | 64.60 | I | N  | 0 |
| ATOM | 9  | CA   | HIS | I | 33  | 33.570 | 101.702 | 35.050 | 1.00 | 64.69 | I | C  | 0 |
| ATOM | 10 | CB   | HIS | I | 137 | 29.528 | 99.989  | 30.215 | 1.00 | 54.82 | I | C  | 0 |
| ATOM | 11 | CG   | HIS | I | 137 | 28.775 | 99.851  | 31.514 | 1.00 | 53.92 | I | C  | 0 |
| ATOM | 12 | CD2  | HIS | I | 137 | 27.490 | 99.400  | 31.715 | 1.00 | 54.16 | I | C  | 0 |
| ATOM | 13 | ND1  | HIS | I | 137 | 29.356 | 100.079 | 32.760 | 1.00 | 52.36 | I | N  | 0 |
| ATOM | 14 | CE1  | HIS | I | 137 | 28.437 | 99.793  | 33.682 | 1.00 | 52.88 | I | C  | 0 |
| ATOM | 15 | NE2  | HIS | I | 137 | 27.299 | 99.382  | 33.081 | 1.00 | 53.20 | I | N  | 0 |
| ATOM | 16 | CB   | HIS | I | 139 | 28.178 | 106.071 | 33.333 | 1.00 | 47.84 | I | C  | 0 |
| ATOM | 17 | CG   | HIS | I | 139 | 28.630 | 104.730 | 33.706 | 1.00 | 48.14 | I | C  | 0 |
| ATOM | 18 | CD2  | HIS | I | 139 | 29.488 | 103.855 | 33.079 | 1.00 | 48.88 | I | C  | 0 |
| ATOM | 19 | ND1  | HIS | I | 139 | 28.249 | 104.112 | 34.877 | 1.00 | 48.41 | I | N  | 0 |
| ATOM | 20 | CE1  | HIS | I | 139 | 28.858 | 102.896 | 34.950 | 1.00 | 48.99 | I | C  | 0 |
| ATOM | 21 | NE2  | HIS | I | 139 | 29.614 | 102.716 | 33.861 | 1.00 | 48.33 | I | N  | 0 |
| ATOM | 22 | CU+1 | CU1 | I | 417 | 30.869 | 101.290 | 33.339 | 1.00 | 73.67 | I | CU | 1 |

END

REMARK 3RFR, Subunit 1, Reduced state

REMARK DATE:11-Apr-2017 17:59:04 created by user: lili

REMARK CNS VERSION:1.3

|      |   |     |     |   |    |        |        |        |      |       |   |   |   |
|------|---|-----|-----|---|----|--------|--------|--------|------|-------|---|---|---|
| ATOM | 1 | CB  | HIS | A | 29 | 49.904 | 34.452 | 46.113 | 1.00 | 78.48 | A | C | 0 |
| ATOM | 2 | CG  | HIS | A | 29 | 50.430 | 35.676 | 46.800 | 1.00 | 78.54 | A | C | 0 |
| ATOM | 3 | CD2 | HIS | A | 29 | 49.880 | 36.941 | 46.776 | 1.00 | 78.53 | A | C | 0 |
| ATOM | 4 | ND1 | HIS | A | 29 | 51.518 | 35.666 | 47.672 | 1.00 | 78.55 | A | N | 0 |
| ATOM | 5 | CE1 | HIS | A | 29 | 51.621 | 36.906 | 48.148 | 1.00 | 78.05 | A | C | 0 |
| ATOM | 6 | NE2 | HIS | A | 29 | 50.649 | 37.701 | 47.635 | 1.00 | 79.24 | A | N | 0 |
| ATOM | 7 | C   | HIS | A | 29 | 49.125 | 32.190 | 46.334 | 1.00 | 78.25 | A | C | 0 |
| ATOM | 8 | N   | HIS | A | 29 | 51.510 | 32.812 | 46.840 | 1.00 | 79.15 | A | N | 0 |
| ATOM | 9 | CA  | HIS | A | 29 | 50.085 | 33.184 | 46.967 | 1.00 | 78.41 | A | C | 0 |

|      |    |      |     |   |     |        |        |        |      |       |   |    |   |
|------|----|------|-----|---|-----|--------|--------|--------|------|-------|---|----|---|
| ATOM | 10 | CB   | HIS | A | 133 | 55.147 | 36.089 | 48.320 | 1.00 | 49.64 | A | C  | 0 |
| ATOM | 11 | CG   | HIS | A | 133 | 54.624 | 36.076 | 49.695 | 1.00 | 53.16 | A | C  | 0 |
| ATOM | 12 | CD2  | HIS | A | 133 | 55.244 | 36.654 | 50.785 | 1.00 | 52.66 | A | C  | 0 |
| ATOM | 13 | ND1  | HIS | A | 133 | 53.443 | 35.493 | 50.085 | 1.00 | 55.37 | A | N  | 0 |
| ATOM | 14 | CE1  | HIS | A | 133 | 53.328 | 35.721 | 51.388 | 1.00 | 55.22 | A | C  | 0 |
| ATOM | 15 | NE2  | HIS | A | 133 | 54.400 | 36.430 | 51.852 | 1.00 | 54.43 | A | N  | 0 |
| ATOM | 16 | CB   | HIS | A | 135 | 55.203 | 29.470 | 50.334 | 1.00 | 53.71 | A | C  | 0 |
| ATOM | 17 | CG   | HIS | A | 135 | 54.332 | 30.604 | 50.095 | 1.00 | 53.64 | A | C  | 0 |
| ATOM | 18 | CD2  | HIS | A | 135 | 54.265 | 31.598 | 49.142 | 1.00 | 53.89 | A | C  | 0 |
| ATOM | 19 | ND1  | HIS | A | 135 | 53.299 | 30.837 | 50.978 | 1.00 | 53.37 | A | N  | 0 |
| ATOM | 20 | CE1  | HIS | A | 135 | 52.639 | 31.952 | 50.561 | 1.00 | 55.61 | A | C  | 0 |
| ATOM | 21 | NE2  | HIS | A | 135 | 53.217 | 32.453 | 49.466 | 1.00 | 54.70 | A | N  | 0 |
| ATOM | 22 | CU+2 | CU2 | A | 419 | 52.513 | 34.050 | 48.621 | 1.00 | 79.73 | A | CU | 2 |

END

REMARK 3RFR, Subunit 1, Oxidised state

REMARK DATE:11-Apr-2017 17:59:04 created by user: lili

REMARK CNS VERSION:1.3

|      |    |      |     |   |     |        |        |        |      |       |   |    |   |
|------|----|------|-----|---|-----|--------|--------|--------|------|-------|---|----|---|
| ATOM | 1  | CB   | HIS | A | 29  | 50.208 | 34.382 | 45.978 | 1.00 | 79.02 | A | C  | 0 |
| ATOM | 2  | CG   | HIS | A | 29  | 50.621 | 35.625 | 46.705 | 1.00 | 78.80 | A | C  | 0 |
| ATOM | 3  | CD2  | HIS | A | 29  | 50.048 | 36.876 | 46.632 | 1.00 | 78.59 | A | C  | 0 |
| ATOM | 4  | ND1  | HIS | A | 29  | 51.581 | 35.637 | 47.721 | 1.00 | 78.91 | A | N  | 0 |
| ATOM | 5  | CE1  | HIS | A | 29  | 51.585 | 36.876 | 48.235 | 1.00 | 78.27 | A | C  | 0 |
| ATOM | 6  | NE2  | HIS | A | 29  | 50.669 | 37.636 | 47.602 | 1.00 | 79.12 | A | N  | 0 |
| ATOM | 7  | C    | HIS | A | 29  | 49.122 | 32.198 | 46.333 | 1.00 | 79.01 | A | C  | 0 |
| ATOM | 8  | N    | HIS | A | 29  | 51.420 | 32.758 | 47.297 | 1.00 | 80.48 | A | N  | 0 |
| ATOM | 9  | CA   | HIS | A | 29  | 50.050 | 33.231 | 46.983 | 1.00 | 79.19 | A | C  | 0 |
| ATOM | 10 | CB   | HIS | A | 133 | 55.148 | 36.089 | 48.284 | 1.00 | 49.30 | A | C  | 0 |
| ATOM | 11 | CG   | HIS | A | 133 | 54.589 | 36.034 | 49.630 | 1.00 | 52.69 | A | C  | 0 |
| ATOM | 12 | CD2  | HIS | A | 133 | 55.082 | 36.685 | 50.738 | 1.00 | 51.36 | A | C  | 0 |
| ATOM | 13 | ND1  | HIS | A | 133 | 53.475 | 35.302 | 49.989 | 1.00 | 55.17 | A | N  | 0 |
| ATOM | 14 | CE1  | HIS | A | 133 | 53.275 | 35.525 | 51.296 | 1.00 | 54.77 | A | C  | 0 |
| ATOM | 15 | NE2  | HIS | A | 133 | 54.231 | 36.362 | 51.770 | 1.00 | 53.16 | A | N  | 0 |
| ATOM | 16 | CB   | HIS | A | 135 | 55.205 | 29.470 | 50.334 | 1.00 | 53.53 | A | C  | 0 |
| ATOM | 17 | CG   | HIS | A | 135 | 54.334 | 30.603 | 50.099 | 1.00 | 53.54 | A | C  | 0 |
| ATOM | 18 | CD2  | HIS | A | 135 | 54.293 | 31.613 | 49.163 | 1.00 | 53.64 | A | C  | 0 |
| ATOM | 19 | ND1  | HIS | A | 135 | 53.285 | 30.818 | 50.965 | 1.00 | 53.36 | A | N  | 0 |
| ATOM | 20 | CE1  | HIS | A | 135 | 52.627 | 31.931 | 50.572 | 1.00 | 55.24 | A | C  | 0 |
| ATOM | 21 | NE2  | HIS | A | 135 | 53.234 | 32.452 | 49.495 | 1.00 | 54.11 | A | N  | 0 |
| ATOM | 22 | CU+2 | CU2 | A | 419 | 52.498 | 34.050 | 48.630 | 1.00 | 81.48 | A | CU | 2 |

END

REMARK 3RFR, Subunit 1, Oxidised state with an extra water molecule

REMARK DATE:11-Apr-2017 17:45:49 created by user: lili

REMARK CNS VERSION:1.3

|      |    |      |     |   |     |        |        |        |      |       |   |    |   |
|------|----|------|-----|---|-----|--------|--------|--------|------|-------|---|----|---|
| ATOM | 1  | CB   | HIS | A | 29  | 50.553 | 34.233 | 45.910 | 1.00 | 75.20 | A | C  | 0 |
| ATOM | 2  | CG   | HIS | A | 29  | 50.819 | 35.534 | 46.606 | 1.00 | 75.45 | A | C  | 0 |
| ATOM | 3  | CD2  | HIS | A | 29  | 50.157 | 36.737 | 46.466 | 1.00 | 75.65 | A | C  | 0 |
| ATOM | 4  | ND1  | HIS | A | 29  | 51.642 | 35.620 | 47.728 | 1.00 | 75.53 | A | N  | 0 |
| ATOM | 5  | CE1  | HIS | A | 29  | 51.484 | 36.847 | 48.242 | 1.00 | 75.15 | A | C  | 0 |
| ATOM | 6  | NE2  | HIS | A | 29  | 50.588 | 37.537 | 47.505 | 1.00 | 75.75 | A | N  | 0 |
| ATOM | 7  | C    | HIS | A | 29  | 49.116 | 32.206 | 46.325 | 1.00 | 75.32 | A | C  | 0 |
| ATOM | 8  | N    | HIS | A | 29  | 51.127 | 32.728 | 47.746 | 1.00 | 76.22 | A | N  | 0 |
| ATOM | 9  | CA   | HIS | A | 29  | 50.006 | 33.265 | 46.969 | 1.00 | 75.23 | A | C  | 0 |
| ATOM | 10 | CB   | HIS | A | 133 | 55.148 | 36.084 | 48.289 | 1.00 | 50.55 | A | C  | 0 |
| ATOM | 11 | CG   | HIS | A | 133 | 54.598 | 36.053 | 49.642 | 1.00 | 53.60 | A | C  | 0 |
| ATOM | 12 | CD2  | HIS | A | 133 | 55.109 | 36.707 | 50.741 | 1.00 | 52.24 | A | C  | 0 |
| ATOM | 13 | ND1  | HIS | A | 133 | 53.488 | 35.330 | 50.018 | 1.00 | 56.05 | A | N  | 0 |
| ATOM | 14 | CE1  | HIS | A | 133 | 53.304 | 35.559 | 51.325 | 1.00 | 55.02 | A | C  | 0 |
| ATOM | 15 | NE2  | HIS | A | 133 | 54.270 | 36.392 | 51.785 | 1.00 | 53.81 | A | N  | 0 |
| ATOM | 16 | CB   | HIS | A | 135 | 55.210 | 29.462 | 50.331 | 1.00 | 52.38 | A | C  | 0 |
| ATOM | 17 | CG   | HIS | A | 135 | 54.333 | 30.586 | 50.113 | 1.00 | 52.71 | A | C  | 0 |
| ATOM | 18 | CD2  | HIS | A | 135 | 54.285 | 31.610 | 49.191 | 1.00 | 52.23 | A | C  | 0 |
| ATOM | 19 | ND1  | HIS | A | 135 | 53.292 | 30.784 | 50.991 | 1.00 | 52.42 | A | N  | 0 |
| ATOM | 20 | CE1  | HIS | A | 135 | 52.632 | 31.904 | 50.616 | 1.00 | 54.19 | A | C  | 0 |
| ATOM | 21 | NE2  | HIS | A | 135 | 53.233 | 32.440 | 49.542 | 1.00 | 52.77 | A | N  | 0 |
| ATOM | 22 | CU+2 | CU2 | A | 419 | 52.508 | 34.052 | 48.698 | 1.00 | 77.21 | A | CU | 2 |
| ATOM | 23 | O    | HOH | A | 420 | 53.618 | 33.361 | 46.562 | 1.00 | 36.62 | A | O  | 0 |

END

REMARK 3RFR, Subunit 2, Reduced state

REMARK DATE:28-Nov-2016 12:00:25 created by user: lili

REMARK CNS VERSION:1.3

|      |   |     |     |   |    |        |         |        |      |       |   |   |   |
|------|---|-----|-----|---|----|--------|---------|--------|------|-------|---|---|---|
| ATOM | 1 | CB  | HIS | E | 29 | 16.569 | -12.883 | 54.958 | 1.00 | 78.25 | E | C | 0 |
| ATOM | 2 | CG  | HIS | E | 29 | 15.439 | -12.937 | 55.949 | 1.00 | 78.11 | E | C | 0 |
| ATOM | 3 | CD2 | HIS | E | 29 | 14.085 | -13.056 | 55.712 | 1.00 | 78.62 | E | C | 0 |
| ATOM | 4 | ND1 | HIS | E | 29 | 15.669 | -13.011 | 57.321 | 1.00 | 76.42 | E | N | 0 |
| ATOM | 5 | CE1 | HIS | E | 29 | 14.484 | -13.218 | 57.890 | 1.00 | 77.56 | E | C | 0 |
| ATOM | 6 | NE2 | HIS | E | 29 | 13.500 | -13.248 | 56.952 | 1.00 | 79.31 | E | N | 0 |
| ATOM | 7 | C   | HIS | E | 29 | 18.769 | -12.489 | 54.377 | 1.00 | 79.15 | E | C | 0 |
| ATOM | 8 | N   | HIS | E | 29 | 17.642 | -11.035 | 56.072 | 1.00 | 79.37 | E | N | 0 |
| ATOM | 9 | CA  | HIS | E | 29 | 17.897 | -12.410 | 55.592 | 1.00 | 78.91 | E | C | 0 |

|      |    |      |     |   |     |        |         |        |      |       |   |    |   |
|------|----|------|-----|---|-----|--------|---------|--------|------|-------|---|----|---|
| ATOM | 10 | CB   | HIS | E | 133 | 14.307 | -10.420 | 60.056 | 1.00 | 64.38 | E | C  | 0 |
| ATOM | 11 | CG   | HIS | E | 133 | 15.150 | -11.339 | 60.881 | 1.00 | 66.46 | E | C  | 0 |
| ATOM | 12 | CD2  | HIS | E | 133 | 15.146 | -11.545 | 62.247 | 1.00 | 67.43 | E | C  | 0 |
| ATOM | 13 | ND1  | HIS | E | 133 | 16.102 | -12.150 | 60.303 | 1.00 | 66.98 | E | N  | 0 |
| ATOM | 14 | CE1  | HIS | E | 133 | 16.676 | -12.835 | 61.284 | 1.00 | 65.96 | E | C  | 0 |
| ATOM | 15 | NE2  | HIS | E | 133 | 16.124 | -12.498 | 62.481 | 1.00 | 66.39 | E | N  | 0 |
| ATOM | 16 | CB   | HIS | E | 135 | 20.623 | -7.700  | 60.115 | 1.00 | 47.31 | E | C  | 0 |
| ATOM | 17 | CG   | HIS | E | 135 | 19.864 | -8.938  | 59.747 | 1.00 | 48.28 | E | C  | 0 |
| ATOM | 18 | CD2  | HIS | E | 135 | 18.658 | -9.176  | 59.124 | 1.00 | 48.99 | E | C  | 0 |
| ATOM | 19 | ND1  | HIS | E | 135 | 20.391 | -10.189 | 59.998 | 1.00 | 48.89 | E | N  | 0 |
| ATOM | 20 | CE1  | HIS | E | 135 | 19.512 | -11.126 | 59.553 | 1.00 | 49.05 | E | C  | 0 |
| ATOM | 21 | NE2  | HIS | E | 135 | 18.449 | -10.538 | 59.021 | 1.00 | 48.87 | E | N  | 0 |
| ATOM | 22 | CU+2 | CU2 | E | 420 | 16.767 | -11.565 | 58.421 | 1.00 | 82.94 | E | CU | 2 |

END

REMARK 3RFR, Subunit 2, Oxidised state

REMARK DATE:28-Nov-2016 12:00:25 created by user: lili

REMARK CNS VERSION:1.3

|      |    |      |     |   |     |        |         |        |      |       |   |    |   |
|------|----|------|-----|---|-----|--------|---------|--------|------|-------|---|----|---|
| ATOM | 1  | CB   | HIS | E | 29  | 16.481 | -12.623 | 54.981 | 1.00 | 80.85 | E | C  | 0 |
| ATOM | 2  | CG   | HIS | E | 29  | 15.406 | -12.855 | 56.012 | 1.00 | 80.62 | E | C  | 0 |
| ATOM | 3  | CD2  | HIS | E | 29  | 14.133 | -13.330 | 55.797 | 1.00 | 81.09 | E | C  | 0 |
| ATOM | 4  | ND1  | HIS | E | 29  | 15.595 | -12.757 | 57.396 | 1.00 | 79.64 | E | N  | 0 |
| ATOM | 5  | CE1  | HIS | E | 29  | 14.478 | -13.195 | 57.985 | 1.00 | 80.54 | E | C  | 0 |
| ATOM | 6  | NE2  | HIS | E | 29  | 13.577 | -13.540 | 57.043 | 1.00 | 81.64 | E | N  | 0 |
| ATOM | 7  | C    | HIS | E | 29  | 18.765 | -12.495 | 54.379 | 1.00 | 81.43 | E | C  | 0 |
| ATOM | 8  | N    | HIS | E | 29  | 17.839 | -11.183 | 56.363 | 1.00 | 82.06 | E | N  | 0 |
| ATOM | 9  | CA   | HIS | E | 29  | 17.879 | -12.461 | 55.607 | 1.00 | 81.34 | E | C  | 0 |
| ATOM | 10 | CB   | HIS | E | 133 | 14.298 | -10.410 | 60.035 | 1.00 | 64.90 | E | C  | 0 |
| ATOM | 11 | CG   | HIS | E | 133 | 15.154 | -11.333 | 60.826 | 1.00 | 66.47 | E | C  | 0 |
| ATOM | 12 | CD2  | HIS | E | 133 | 15.085 | -11.667 | 62.161 | 1.00 | 67.06 | E | C  | 0 |
| ATOM | 13 | ND1  | HIS | E | 133 | 16.213 | -12.014 | 60.257 | 1.00 | 66.88 | E | N  | 0 |
| ATOM | 14 | CE1  | HIS | E | 133 | 16.789 | -12.742 | 61.218 | 1.00 | 66.30 | E | C  | 0 |
| ATOM | 15 | NE2  | HIS | E | 133 | 16.125 | -12.555 | 62.381 | 1.00 | 66.13 | E | N  | 0 |
| ATOM | 16 | CB   | HIS | E | 135 | 20.627 | -7.695  | 60.116 | 1.00 | 47.65 | E | C  | 0 |
| ATOM | 17 | CG   | HIS | E | 135 | 19.882 | -8.934  | 59.755 | 1.00 | 48.47 | E | C  | 0 |
| ATOM | 18 | CD2  | HIS | E | 135 | 18.636 | -9.171  | 59.224 | 1.00 | 48.90 | E | C  | 0 |
| ATOM | 19 | ND1  | HIS | E | 135 | 20.453 | -10.177 | 59.929 | 1.00 | 48.82 | E | N  | 0 |
| ATOM | 20 | CE1  | HIS | E | 135 | 19.573 | -11.126 | 59.543 | 1.00 | 49.03 | E | C  | 0 |
| ATOM | 21 | NE2  | HIS | E | 135 | 18.456 | -10.538 | 59.117 | 1.00 | 48.70 | E | N  | 0 |
| ATOM | 22 | CU+2 | CU2 | E | 420 | 16.855 | -11.559 | 58.403 | 1.00 | 86.08 | E | CU | 2 |

END

REMARK 3RFR, Subunit 2, Oxidised state with an extra water molecule

REMARK DATE:12-Apr-2017 14:20:10 created by user: lili

REMARK CNS VERSION:1.3

|      |    |      |     |   |     |        |         |        |      |       |   |    |   |
|------|----|------|-----|---|-----|--------|---------|--------|------|-------|---|----|---|
| ATOM | 1  | CB   | HIS | E | 29  | 16.503 | -12.684 | 54.985 | 1.00 | 81.59 | E | C  | 0 |
| ATOM | 2  | CG   | HIS | E | 29  | 15.410 | -12.873 | 56.005 | 1.00 | 81.34 | E | C  | 0 |
| ATOM | 3  | CD2  | HIS | E | 29  | 14.109 | -13.263 | 55.779 | 1.00 | 81.73 | E | C  | 0 |
| ATOM | 4  | ND1  | HIS | E | 29  | 15.605 | -12.809 | 57.390 | 1.00 | 80.25 | E | N  | 0 |
| ATOM | 5  | CE1  | HIS | E | 29  | 14.461 | -13.186 | 57.970 | 1.00 | 81.19 | E | C  | 0 |
| ATOM | 6  | NE2  | HIS | E | 29  | 13.540 | -13.459 | 57.022 | 1.00 | 82.26 | E | N  | 0 |
| ATOM | 7  | C    | HIS | E | 29  | 18.771 | -12.496 | 54.383 | 1.00 | 82.28 | E | C  | 0 |
| ATOM | 8  | N    | HIS | E | 29  | 17.794 | -11.169 | 56.352 | 1.00 | 82.90 | E | N  | 0 |
| ATOM | 9  | CA   | HIS | E | 29  | 17.887 | -12.464 | 55.627 | 1.00 | 82.16 | E | C  | 0 |
| ATOM | 10 | CB   | HIS | E | 133 | 14.300 | -10.410 | 60.034 | 1.00 | 64.98 | E | C  | 0 |
| ATOM | 11 | CG   | HIS | E | 133 | 15.159 | -11.324 | 60.816 | 1.00 | 66.53 | E | C  | 0 |
| ATOM | 12 | CD2  | HIS | E | 133 | 15.113 | -11.656 | 62.154 | 1.00 | 67.04 | E | C  | 0 |
| ATOM | 13 | ND1  | HIS | E | 133 | 16.202 | -12.017 | 60.231 | 1.00 | 67.00 | E | N  | 0 |
| ATOM | 14 | CE1  | HIS | E | 133 | 16.792 | -12.747 | 61.181 | 1.00 | 66.38 | E | C  | 0 |
| ATOM | 15 | NE2  | HIS | E | 133 | 16.150 | -12.551 | 62.356 | 1.00 | 66.09 | E | N  | 0 |
| ATOM | 16 | CB   | HIS | E | 135 | 20.624 | -7.703  | 60.117 | 1.00 | 47.70 | E | C  | 0 |
| ATOM | 17 | CG   | HIS | E | 135 | 19.873 | -8.929  | 59.759 | 1.00 | 48.53 | E | C  | 0 |
| ATOM | 18 | CD2  | HIS | E | 135 | 18.628 | -9.156  | 59.220 | 1.00 | 49.10 | E | C  | 0 |
| ATOM | 19 | ND1  | HIS | E | 135 | 20.431 | -10.180 | 59.932 | 1.00 | 48.90 | E | N  | 0 |
| ATOM | 20 | CE1  | HIS | E | 135 | 19.547 | -11.123 | 59.537 | 1.00 | 48.90 | E | C  | 0 |
| ATOM | 21 | NE2  | HIS | E | 135 | 18.438 | -10.522 | 59.106 | 1.00 | 48.78 | E | N  | 0 |
| ATOM | 22 | O    | HOH | E | 419 | 18.763 | -14.119 | 58.597 | 1.00 | 76.39 | E | O  | 0 |
| ATOM | 23 | CU+2 | CU2 | E | 420 | 16.863 | -11.579 | 58.389 | 1.00 | 84.92 | E | CU | 2 |

END

REMARK 3RFR, Subunit 3, Reduced state

REMARK DATE:28-Nov-2016 12:00:25 created by user: lili

REMARK CNS VERSION:1.3

|      |   |     |     |   |    |        |         |        |      |       |   |   |   |
|------|---|-----|-----|---|----|--------|---------|--------|------|-------|---|---|---|
| ATOM | 1 | CB  | HIS | I | 29 | 71.009 | -19.302 | 34.919 | 1.00 | 76.64 | I | C | 0 |
| ATOM | 2 | CG  | HIS | I | 29 | 72.127 | -20.295 | 35.141 | 1.00 | 76.90 | I | C | 0 |
| ATOM | 3 | CD2 | HIS | I | 29 | 72.990 | -20.827 | 34.204 | 1.00 | 76.91 | I | C | 0 |
| ATOM | 4 | ND1 | HIS | I | 29 | 72.545 | -20.746 | 36.406 | 1.00 | 77.70 | I | N | 0 |
| ATOM | 5 | CE1 | HIS | I | 29 | 73.631 | -21.503 | 36.216 | 1.00 | 76.48 | I | C | 0 |
| ATOM | 6 | NE2 | HIS | I | 29 | 73.923 | -21.588 | 34.891 | 1.00 | 76.21 | I | N | 0 |
| ATOM | 7 | C   | HIS | I | 29 | 70.053 | -17.100 | 35.655 | 1.00 | 78.29 | I | C | 0 |
| ATOM | 8 | N   | HIS | I | 29 | 70.122 | -19.079 | 37.154 | 1.00 | 78.47 | I | N | 0 |
| ATOM | 9 | CA  | HIS | I | 29 | 70.843 | -18.324 | 36.121 | 1.00 | 77.51 | I | C | 0 |

|      |    |      |     |   |     |        |         |        |      |       |   |    |   |
|------|----|------|-----|---|-----|--------|---------|--------|------|-------|---|----|---|
| ATOM | 10 | CB   | HIS | I | 133 | 72.019 | -23.668 | 38.446 | 1.00 | 68.19 | I | C  | 0 |
| ATOM | 11 | CG   | HIS | I | 133 | 73.118 | -23.008 | 39.295 | 1.00 | 69.03 | I | C  | 0 |
| ATOM | 12 | CD2  | HIS | I | 133 | 74.179 | -23.625 | 39.951 | 1.00 | 69.37 | I | C  | 0 |
| ATOM | 13 | ND1  | HIS | I | 133 | 73.222 | -21.629 | 39.434 | 1.00 | 68.64 | I | N  | 0 |
| ATOM | 14 | CE1  | HIS | I | 133 | 74.313 | -21.403 | 40.158 | 1.00 | 68.41 | I | C  | 0 |
| ATOM | 15 | NE2  | HIS | I | 133 | 74.932 | -22.579 | 40.489 | 1.00 | 69.35 | I | N  | 0 |
| ATOM | 16 | CB   | HIS | I | 135 | 68.328 | -19.987 | 42.685 | 1.00 | 43.79 | I | C  | 0 |
| ATOM | 17 | CG   | HIS | I | 135 | 69.341 | -19.969 | 41.642 | 1.00 | 43.91 | I | C  | 0 |
| ATOM | 18 | CD2  | HIS | I | 135 | 69.639 | -20.796 | 40.577 | 1.00 | 43.76 | I | C  | 0 |
| ATOM | 19 | ND1  | HIS | I | 135 | 70.149 | -18.862 | 41.521 | 1.00 | 43.89 | I | N  | 0 |
| ATOM | 20 | CE1  | HIS | I | 135 | 70.893 | -19.016 | 40.385 | 1.00 | 44.83 | I | C  | 0 |
| ATOM | 21 | NE2  | HIS | I | 135 | 70.614 | -20.184 | 39.803 | 1.00 | 43.38 | I | N  | 0 |
| ATOM | 22 | CU+2 | CU2 | I | 420 | 71.598 | -20.589 | 38.156 | 1.00 | 82.47 | I | CU | 2 |

END

REMARK 3RFR, Subunit 3, Oxidised state

REMARK DATE:28-Nov-2016 12:00:25 created by user: lili

REMARK CNS VERSION:1.3

|      |    |      |     |   |     |        |         |        |      |       |   |    |   |
|------|----|------|-----|---|-----|--------|---------|--------|------|-------|---|----|---|
| ATOM | 1  | CB   | HIS | I | 29  | 71.003 | -19.318 | 34.918 | 1.00 | 75.89 | I | C  | 0 |
| ATOM | 2  | CG   | HIS | I | 29  | 72.119 | -20.308 | 35.143 | 1.00 | 76.17 | I | C  | 0 |
| ATOM | 3  | CD2  | HIS | I | 29  | 73.003 | -20.823 | 34.220 | 1.00 | 76.17 | I | C  | 0 |
| ATOM | 4  | ND1  | HIS | I | 29  | 72.531 | -20.771 | 36.411 | 1.00 | 77.04 | I | N  | 0 |
| ATOM | 5  | CE1  | HIS | I | 29  | 73.635 | -21.520 | 36.230 | 1.00 | 75.75 | I | C  | 0 |
| ATOM | 6  | NE2  | HIS | I | 29  | 73.932 | -21.579 | 34.915 | 1.00 | 75.55 | I | N  | 0 |
| ATOM | 7  | C    | HIS | I | 29  | 70.058 | -17.102 | 35.657 | 1.00 | 77.52 | I | C  | 0 |
| ATOM | 8  | N    | HIS | I | 29  | 70.266 | -19.125 | 37.215 | 1.00 | 77.77 | I | N  | 0 |
| ATOM | 9  | CA   | HIS | I | 29  | 70.880 | -18.337 | 36.116 | 1.00 | 76.79 | I | C  | 0 |
| ATOM | 10 | CB   | HIS | I | 133 | 71.993 | -23.684 | 38.411 | 1.00 | 69.80 | I | C  | 0 |
| ATOM | 11 | CG   | HIS | I | 133 | 73.028 | -22.960 | 39.244 | 1.00 | 70.43 | I | C  | 0 |
| ATOM | 12 | CD2  | HIS | I | 133 | 74.103 | -23.447 | 39.972 | 1.00 | 70.29 | I | C  | 0 |
| ATOM | 13 | ND1  | HIS | I | 133 | 73.043 | -21.567 | 39.284 | 1.00 | 70.58 | I | N  | 0 |
| ATOM | 14 | CE1  | HIS | I | 133 | 74.097 | -21.207 | 40.035 | 1.00 | 70.14 | I | C  | 0 |
| ATOM | 15 | NE2  | HIS | I | 133 | 74.761 | -22.317 | 40.452 | 1.00 | 69.87 | I | N  | 0 |
| ATOM | 16 | CB   | HIS | I | 135 | 68.323 | -19.992 | 42.681 | 1.00 | 43.95 | I | C  | 0 |
| ATOM | 17 | CG   | HIS | I | 135 | 69.341 | -19.971 | 41.639 | 1.00 | 44.15 | I | C  | 0 |
| ATOM | 18 | CD2  | HIS | I | 135 | 69.649 | -20.779 | 40.562 | 1.00 | 43.82 | I | C  | 0 |
| ATOM | 19 | ND1  | HIS | I | 135 | 70.143 | -18.857 | 41.551 | 1.00 | 44.25 | I | N  | 0 |
| ATOM | 20 | CE1  | HIS | I | 135 | 70.897 | -18.964 | 40.431 | 1.00 | 45.19 | I | C  | 0 |
| ATOM | 21 | NE2  | HIS | I | 135 | 70.622 | -20.123 | 39.816 | 1.00 | 43.42 | I | N  | 0 |
| ATOM | 22 | CU+2 | CU2 | I | 420 | 71.602 | -20.533 | 38.166 | 1.00 | 83.83 | I | CU | 2 |

END

REMARK 3RFR, Subunit 3, Oxidised state with an extra water molecule

REMARK DATE:12-Apr-2017 14:54:54 created by user: lili

REMARK CNS VERSION:1.3

|      |    |      |     |   |     |        |         |        |      |       |   |    |   |
|------|----|------|-----|---|-----|--------|---------|--------|------|-------|---|----|---|
| ATOM | 1  | CB   | HIS | I | 29  | 70.997 | -19.319 | 34.928 | 1.00 | 77.06 | I | C  | 0 |
| ATOM | 2  | CG   | HIS | I | 29  | 72.114 | -20.311 | 35.138 | 1.00 | 77.31 | I | C  | 0 |
| ATOM | 3  | CD2  | HIS | I | 29  | 72.969 | -20.855 | 34.203 | 1.00 | 77.29 | I | C  | 0 |
| ATOM | 4  | ND1  | HIS | I | 29  | 72.552 | -20.752 | 36.405 | 1.00 | 78.09 | I | N  | 0 |
| ATOM | 5  | CE1  | HIS | I | 29  | 73.641 | -21.518 | 36.213 | 1.00 | 76.86 | I | C  | 0 |
| ATOM | 6  | NE2  | HIS | I | 29  | 73.908 | -21.606 | 34.891 | 1.00 | 76.67 | I | N  | 0 |
| ATOM | 7  | C    | HIS | I | 29  | 70.060 | -17.099 | 35.661 | 1.00 | 78.66 | I | C  | 0 |
| ATOM | 8  | N    | HIS | I | 29  | 70.286 | -19.111 | 37.236 | 1.00 | 78.87 | I | N  | 0 |
| ATOM | 9  | CA   | HIS | I | 29  | 70.893 | -18.334 | 36.127 | 1.00 | 77.97 | I | C  | 0 |
| ATOM | 10 | CB   | HIS | I | 133 | 71.995 | -23.681 | 38.415 | 1.00 | 70.54 | I | C  | 0 |
| ATOM | 11 | CG   | HIS | I | 133 | 73.017 | -22.958 | 39.248 | 1.00 | 71.12 | I | C  | 0 |
| ATOM | 12 | CD2  | HIS | I | 133 | 74.087 | -23.432 | 39.993 | 1.00 | 70.93 | I | C  | 0 |
| ATOM | 13 | ND1  | HIS | I | 133 | 73.038 | -21.564 | 39.263 | 1.00 | 71.41 | I | N  | 0 |
| ATOM | 14 | CE1  | HIS | I | 133 | 74.088 | -21.189 | 40.012 | 1.00 | 70.91 | I | C  | 0 |
| ATOM | 15 | NE2  | HIS | I | 133 | 74.745 | -22.295 | 40.457 | 1.00 | 70.55 | I | N  | 0 |
| ATOM | 16 | CB   | HIS | I | 135 | 68.328 | -19.991 | 42.678 | 1.00 | 43.89 | I | C  | 0 |
| ATOM | 17 | CG   | HIS | I | 135 | 69.339 | -19.974 | 41.642 | 1.00 | 44.04 | I | C  | 0 |
| ATOM | 18 | CD2  | HIS | I | 135 | 69.644 | -20.780 | 40.561 | 1.00 | 43.68 | I | C  | 0 |
| ATOM | 19 | ND1  | HIS | I | 135 | 70.146 | -18.862 | 41.551 | 1.00 | 44.25 | I | N  | 0 |
| ATOM | 20 | CE1  | HIS | I | 135 | 70.902 | -18.969 | 40.429 | 1.00 | 44.79 | I | C  | 0 |
| ATOM | 21 | NE2  | HIS | I | 135 | 70.619 | -20.126 | 39.816 | 1.00 | 43.21 | I | N  | 0 |
| ATOM | 22 | O    | HOH | I | 419 | 73.631 | -17.917 | 38.640 | 1.00 | 60.97 | I | O  | 0 |
| ATOM | 23 | CU+2 | CU2 | I | 420 | 71.621 | -20.507 | 38.169 | 1.00 | 83.12 | I | CU | 2 |

END
